# 1 Predicting efficiency of writing short sequences 2 into the genome using prime editing

3  
4 Jonas Koeppel<sup>1,†</sup> Elin Madli Peets<sup>1,†</sup>, Juliane Weller<sup>1,†</sup>, Ananth Pallaseni<sup>1</sup>, Fabio Liberante<sup>1</sup>, Leopold  
5 Parts<sup>1,2,\*</sup>

6  
7 <sup>1</sup> Wellcome Sanger Institute, Wellcome Genome Campus, Hinxton, UK

8 <sup>2</sup> Department of Computer Science, University of Tartu, Tartu, Estonia

9 † These authors contributed equally to this work

10 \* Corresponding author. Tel: +44 1223 834 244; E-mail: [leopold.parts@sanger.ac.uk](mailto:leopold.parts@sanger.ac.uk)

11

12

## 13 SUMMARY

14 Short sequences can be precisely written into a selected genomic target using prime editing.  
15 This ability facilitates protein tagging, correction of pathogenic deletions, and many other  
16 exciting applications. However, it remains unclear what types of sequences prime editors can  
17 easily insert, and how to choose optimal reagents for a desired outcome. To characterize  
18 features that influence insertion efficiency, we designed a library of 2,666 sequences up to 69  
19 nt in length and measured the frequency of their insertion into four genomic sites in three  
20 human cell lines, using different prime editor systems. We discover that insertion sequence  
21 length, nucleotide composition and secondary structure all affect insertion rates, and that  
22 mismatch repair proficiency is a strong determinant for the shortest insertions. Combining the  
23 sequence and repair features into a machine learning model, we can predict insertion  
24 frequency for new sequences with  $R = 0.69$ . The tools we provide allow users to choose  
25 optimal constructs for DNA insertion using prime editing.

## 26 INTRODUCTION

27 Efficient insertion of short DNA sequences into genomes could change the course of  
28 biotechnology and medicine. Small insertions can encode protein tags for purification and  
29 visualization, or allow manipulation of protein localization, half-life, and interaction profiles to  
30 control their function. Integrating sequences for transcription factor binding sites and splicing  
31 modulators provides control over gene expression, while introducing structural elements or  
32 recombinase sites can change DNA conformation and provide a substrate for large-scale  
33 engineering<sup>1,2</sup>. For therapeutic opportunities, over 16,000 small deletion variants have been  
34 causally linked to disease<sup>3,4</sup>, and could in principle be restored by inserting the missing  
35 sequence<sup>5,6</sup>. A prominent example is cystic fibrosis, where 70% of cases are caused by a 3 nt  
36 deletion<sup>7,8</sup>. An ideal tool to enable these applications would integrate the edits efficiently,  
37 accurately, and safely, avoiding unintended outcomes or double strand break stress that has  
38 hampered Cas9-based therapies<sup>9-11</sup>.

39  
40 Prime editors can insert short DNA sequences without generating double-strand breaks or  
41 needing an external template. They consist of a nicking version of Cas9 fused to a reverse  
42 transcriptase domain, which is complexed with a prime editing guide RNA (pegRNA)<sup>12</sup>. The  
43 pegRNA comprises a primer binding site homologous to the sequence in the target, and a  
44 reverse transcriptase template that includes the intended edit, all in the 3' extension of a  
45 standard CRISPR/Cas9 guide RNA. At the target site, Cas9 nicks one strand of the genomic  
46 DNA, which then anneals to the primer binding site on the pegRNA, and is extended by the  
47 Cas9-fused reverse transcriptase using the pegRNA-encoded template sequence. Next, DNA  
48 repair mechanisms resolve the conflicting sequences on the two DNA strands, ultimately  
49 writing the intended edit into the genome. When CRISPR/Cas9 was compared to molecular  
50 scissors capable of disrupting target genes, and base editors were called molecular pencils  
51 for their ability to substitute single nucleotides, prime editors were described as molecular  
52 word processors able to perform search and replace operations directly on the genome<sup>13</sup>.

53  
54 The prime editing system is complex, and the determinants of its efficiency are not fully  
55 understood. Several partly independent steps, including three DNA binding events and a  
56 successful mismatch repair are needed to produce an edit, each potentially introducing biases.  
57 In the largest study so far to understand these biases, Kim et al. comprehensively tested the  
58 consequences of varying the reverse transcription templates and primer binding site lengths  
59 using a library of 55,000 pegRNAs. Editing rate increased with Cas9 gRNA activity, as well as

60 GC content and melting temperature of the primer binding site. Primer binding sites of 13 nt  
61 and reverse transcriptase templates of 12 nt generally worked well<sup>14</sup>.

62

63 The majority of libraries used by Kim *et al.* contained the same single nucleotide substitution  
64 5 nt upstream of the nick site. Similarly, nearly all current characterization of prime editing  
65 efficacy has predominantly focused on single nucleotide substitutions<sup>12,15-18</sup>. Of the many  
66 possible useful sequences in molecular biology, only a handful have been introduced with  
67 prime editing and the longest successfully reported insertion was 44 nt in length<sup>12</sup>. Therefore,  
68 in contrast to relatively deep understanding of Cas9 mutagenesis<sup>10,19-21</sup> and base editing  
69 outcomes<sup>22-24</sup> very little is known about how the inserted sequence affects efficiency, and the  
70 length range of insertions feasible by prime editing has not been defined.

71

72 Here, we systematically measure the insertion efficiency of over 2,600 sequences and identify  
73 the features responsible. We find that insertion sequence length, nucleotide composition,  
74 secondary structure, and repair pathway activity together explain most of the variation in  
75 insertion rate. We then use these insights to train a sequence-based prediction model  
76 informed by mismatch repair efficiency that predicts editing outcomes for novel sequences  
77 with high accuracy, and allows selection of optimal reagents for new insertions.

## 78 **RESULTS**

79 We sought to systematically characterize how the length and composition of inserted  
80 sequence, as well as cell line, target site, and the version of the prime editor system affect  
81 insertion rates. To do so, we designed 2,666 pegRNAs encoding insertions immediately  
82 upstream of the nick site. These comprise 270 sequences useful for molecular biology  
83 (including e.g. His-6 tag, recombinase sites, and mNeonGreen<sup>1125</sup>), 1,957 eukaryotic linear  
84 motifs<sup>26,27</sup>, and 439 sequences with variable secondary structure (Figure 1a). The insertion  
85 lengths ranged from 1 to 69 nt, with varied GC content (Figure 1b). We used lentiviruses to  
86 deliver the library against four target sites (three previously tested: HEK3, EMX1, FANCF<sup>12</sup>  
87 and the safe-harbor CLYBL locus<sup>28</sup>) in two cell lines (HEK293T and HAP1), followed by  
88 transient transfection of the prime editor plasmid, five days of selection, and sequencing of  
89 two amplicons from the cell pool, one of the targeted locus and one of the pegRNA locus  
90 (Figure 1c). We calculated insertion efficiencies as the fraction of reads in the target site  
91 amplicon with a given insertion divided by the fraction of reads for the pegRNA encoding it in  
92 the pegRNA amplicon, and analyse them as the main statistic in the rest of the study.

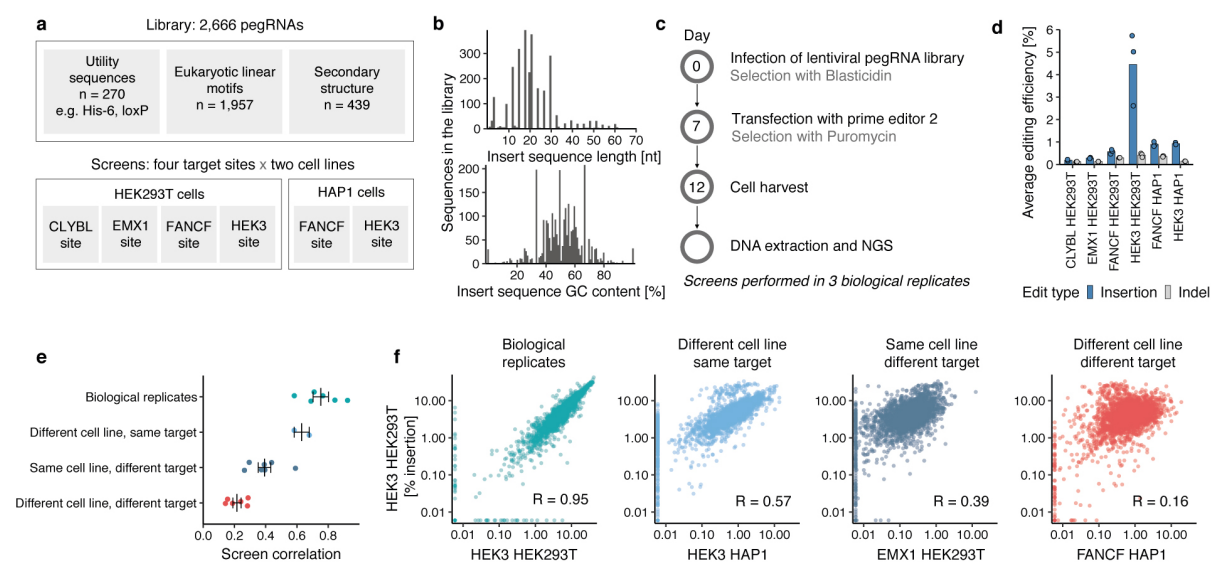

93  
94 **Figure 1. High-throughput measurement of prime insertion efficiencies.** a. Screen setup. b. Library  
95 composition. Number of sequences in the library (y-axis) with different insert sequence lengths (x-axis,  
96 top panel) and %GC content (x-axis, bottom panel). c. Experimental design d. Editing frequencies.  
97 Average mutation frequency (y-axis) for different screens (x-axis) stratified by mutation type (blue:  
98 insertions; grey: indels). Markers represent one replicate and bars the average across  $n=3$  biological  
99 replicates. e. Replicate concordance. Pearson's R between insertion rates in two screens (x-axis) for  
100 different comparisons (y-axis, colors). Markers: correlation value of one pair of screens (for replicate  
101 correlations, mean of pairwise comparison across  $n=3$  biological replicates); line and whiskers: mean  
102 and standard error of mean. f. Representative examples of categories from (e). Percent insertion in the  
103 HEK3 locus in HEK293T cells (y-axis) compared to values (x-axis) in other contexts (panels, colors) for  
104 insertion sequences (markers). Left panel: comparison of biological replicates; other panels:  
105 comparison of replicate averages. Label: Pearson's R of values in linear scale. Colors: as in (e).

106  
107 Insertion efficiencies of pegRNAs varied widely. The top 1% of pegRNAs were inserted 210-  
108 2,040 times more efficiently than the bottom 1% across the various target site and cell line  
109 combinations (Supplementary Figure 1a), indicating substantial sequence-dependent  
110 variation. The insertion rates were highly consistent across biological replicates (average  
111 Pearson's  $R=0.76$ , range 0.64-0.95; Supplementary Figure 1b), but differed in magnitude  
112 across screens (average across pegRNAs 0.19% for CLYBL locus in HEK293T to 4.45% for  
113 HEK3 locus in HEK293T cells, Figure 1d). Small insertions and deletions around the target  
114 site were rare (0.12%-0.42%, Figure 1d), as were additional single-nucleotide mutations  
115 around the nicking site derived from the prime editing process (0.03% on average in reads  
116 with an inserted sequence vs 0.03% in reads without insertions, Supplementary Figure 1c).  
117 Overall, the intended insertions were the dominant mutations generated, and we do not  
118 consider the unintended edits further.

119

120 To understand the consistency of insertion efficiencies across contexts, we next compared  
121 them between replicates, cell lines, and target sites. Insertion rates into the same target site  
122 in different cell lines were more correlated (mean Pearson's  $R=0.63$ ) than into different target  
123 sites in the same line (mean Pearson's  $R=0.39$ ), indicating a greater dependence on target  
124 locus than cellular background. The correlation was weakest when both target site and cell  
125 line were different (mean Pearson's  $R=0.22$ , Figure 1e-f), demonstrating both target  
126 sequence-specific, and cell line-dependent biases on insertion.

### 127 **Insert size effects**

128 Given the repeatable sequence dependent variation in insertion rates that spans over three  
129 orders of magnitude, we sought to understand the responsible features. We first asked how  
130 insert sequence length affects insertion efficiency. For HEK293T cells, sequences of up to  
131 4 nt (all four single nucleotides, all 16 dinucleotides, and 63 trinucleotides) were inserted on  
132 average 2.1-4.6 times more efficiently than longer ones across the four targeted sites (Figure  
133 2a). Insertion frequency did not decrease monotonically with increasing insert length, as  
134 sequences between 15 and 21 nt were inserted 1.3-1.6 times more efficiently than 10-14 nt  
135 ones (Figure 2a). These relative biases in efficiency were shared between all target sites,  
136 despite a 20-fold range of their average insertion rates. Inserts longer than 45 nt were  
137 incorporated less frequently, albeit at a screen average rate of 22-38% of sequences shorter  
138 than 45 nt. The longest sequence that was inserted at  $> 1\%$  frequency (1.4%, HEK3 site in  
139 HEK293T cells) was 66 nt, demonstrating that reasonably efficient integration of moderately  
140 long sequences is feasible with prime editing.

141

142 In contrast to HEK293T cells, insertion frequency of the short 1-4 nt sequences was 1.2 to  
143 3.7-fold lower than that for longer ones in HAP1 cells (Figure 2b). This reduced the correlation  
144 of insertion rates between the two cell lines at the same site compared to replicate correlation  
145 (Pearson's  $R=0.68$  for FANCF and 0.57 for HEK3, Figure 2b; median replicate correlation  
146  $R=0.75$ , Supplementary Figure 2a). However, stratifying the inserted sequences by length  
147 recovers strong concordance, with correlations between rates in HAP1 and HEK293 cells at  
148 the HEK3 locus increasing to 0.67, 0.78, and 0.80, respectively, for sequences of lengths 1-4  
149 nt, 5-15 nt, and 16-70 nt. This correlation within length bins indicates consistent pegRNA  
150 effects, while the discordance between bin averages across lines (but not targets in the same  
151 line) hints that the cellular context does not influence inserts of different lengths in the same  
152 way. One possible explanation is mismatch repair (MMR) proficiency, since HEK293T cells  
153 are partly MMR deficient due to promoter methylation of MLH1<sup>29</sup>, while HAP1 cells are not.

154 The MMR pathway recognizes and excises short mismatches of less than 13 nt and could  
 155 therefore remove short insertions in HAP1 cells before the nicked strand is re-ligated<sup>17,30</sup>.  
 156

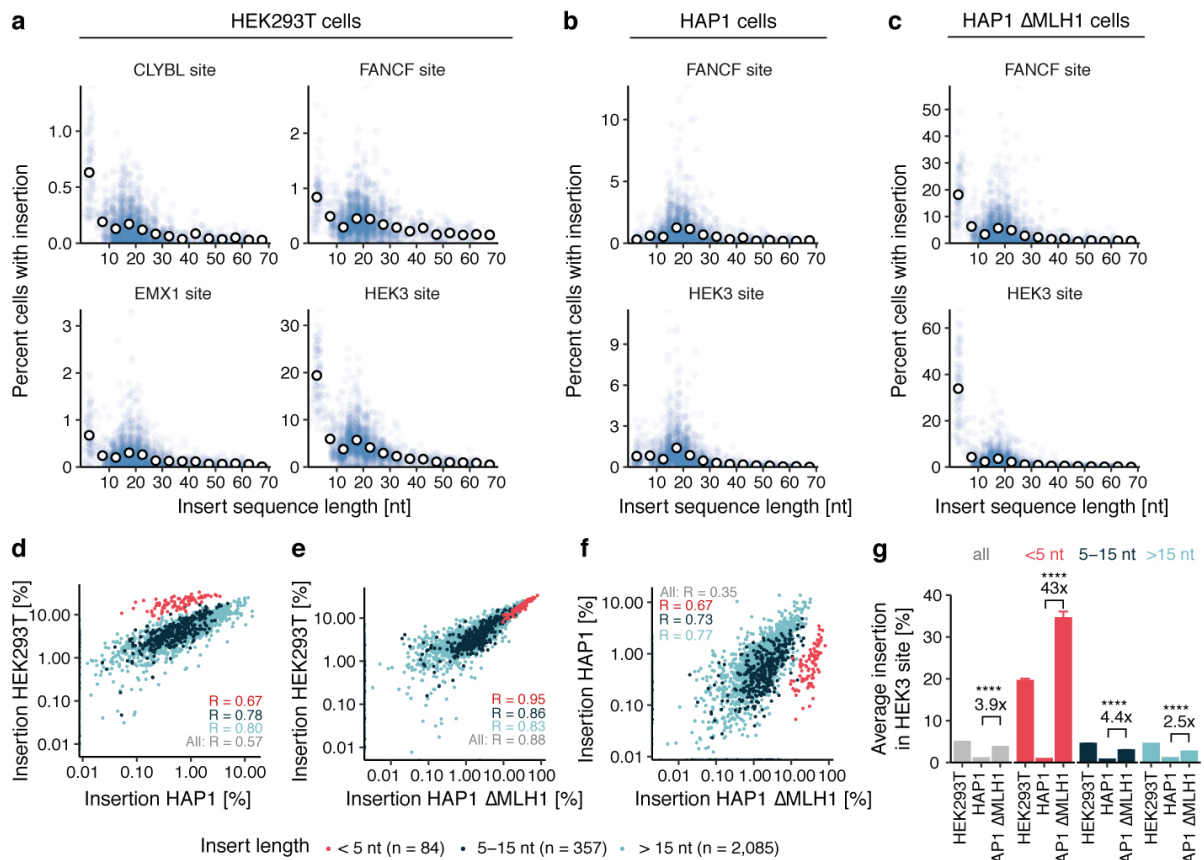

157  
 158 **Figure 2. Prime insertion efficiency depends on insert length.** **a.** Insertion rate in HEK293T cells.  
 159 Percent cells with insertion (y-axis) for different insert sizes (x-axis) of individual sequences (blue  
 160 markers) and their averages in 5nt length bins (white markers) at different target sites (panels). Data  
 161 represent the average of  $n=3$  biological replicates. **b.** As a), but for HAP1 cells. **c.** As a), but for HAP1  
 162  $\Delta$ MLH1 cells. **d.** Insertion rate in HEK293T cells (y-axis) compared to rate in HAP1 cells (x-axis) at the  
 163 HEK3 target of individual sequences (markers). Red: short sequences (up to 4nt); blue: medium  
 164 sequences (5-15nt); teal: longer sequences (>15nt). Label: Pearson's R between rates. The data are  
 165 an average from  $n=3$  biological replicates. **e-f.** As (d), but comparing insertion rates in HAP1  $\Delta$ MLH1  
 166 cells with HEK293T cells (e) and HAP1 wild type cells (f). **g.** MLH1 knockout increases insertion rates  
 167 disproportionately for short sequences. Average insertion rates at the HEK3 locus (y-axis) across  
 168 different cellular contexts (x-axis) for different length bins (colors). Comparison: ratio of average  
 169 insertion rate between HAP1  $\Delta$ MLH1 cells and HAP1 wild type cells; p-values (all <  $1 \times 10^{-33}$ ) from two-  
 170 sided Student's t-test. Error bars: standard error of the mean. Colors as in (d)-(f).  
 171



172 To test the hypothesis that rates of inserting short sequences differ between cell lines due to  
173 mismatch repair activity, we screened the HEK3 and FANCF-targeted libraries in HAP1 cells  
174 that are knockout for MLH1 (HAP1  $\Delta$ MLH1, Supplementary Figure 2b,c). We found that  
175 average insertion rates increased 3.9 to 5.1-fold in the mutant background compared to wild  
176 type HAP1 cells. The rates 1-4 nt sequences were most affected, increasing by 43-66 fold to  
177 19-34%, while the rates of 5-15 nt and >15 nt sequences increased 4.4-7.9 fold and 2.5-4.2  
178 fold, respectively (Figure 2g, Supplementary Figure 2d,e). These remarkable increases in  
179 insertion rates for short sequences are consistent with a model where MMR predominantly  
180 recognizes short insertions, and thereby antagonizes prime editing. Indeed, for the HEK3  
181 target site, insertion rates in HAP1  $\Delta$ MLH1 cells are as correlated to HEK293T cells as  
182 replicates (Pearson's  $R = 0.88$ , Figure 2e, Supplementary Figure 1b) while correlations  
183 between wild type HAP1 and HAP1  $\Delta$ MLH1 cells are modest (Pearson's  $R = 0.35$ , Figure 2f)  
184 and improve when stratifying by sequence length. The same pattern of higher insertion rates  
185 for short sequences in  $\Delta$ MLH1 cells was observed for the FANCF locus (Supplementary  
186 Figure 2f,g). These findings highlight that MMR proficiency is the major source of variation  
187 between the tested cellular contexts for prime insertions.

### 188 **Sequence effects**

189 We next examined the length-independent causes of variation in insertion rate. We calculated  
190 the relative insertion rate for each insert by dividing its marginal rate by the median in a 5-nt  
191 length bin (Methods), and observed it is positively correlated with GC content across all target  
192 sites and cell lines (Figure 3a). Each extra percentage in GC content increased the relative  
193 insertion rate between 1.8% (FANCF site in HEK293 cells) and 4.9% (EMX1 site HEK293T  
194 cells) on average. Specifically, we observed a strong cytosine preference for the CLYBL,  
195 EMX1, and HEK3 loci (each extra percent cytosine increases relative insertion rate by 2.7-  
196 5.4%), while both the percent of cytosines (0.9-1.2%) and guanines (1.3-3.3%) increase  
197 insertion rates for the FANCF locus. Conversely, percent of adenine and thymine decreased  
198 insertion rates for all loci and cell lines (-0.8% to -5.1% and -0.5% to -3.6% respectively,  
199 Supplementary Figure 3a,b).

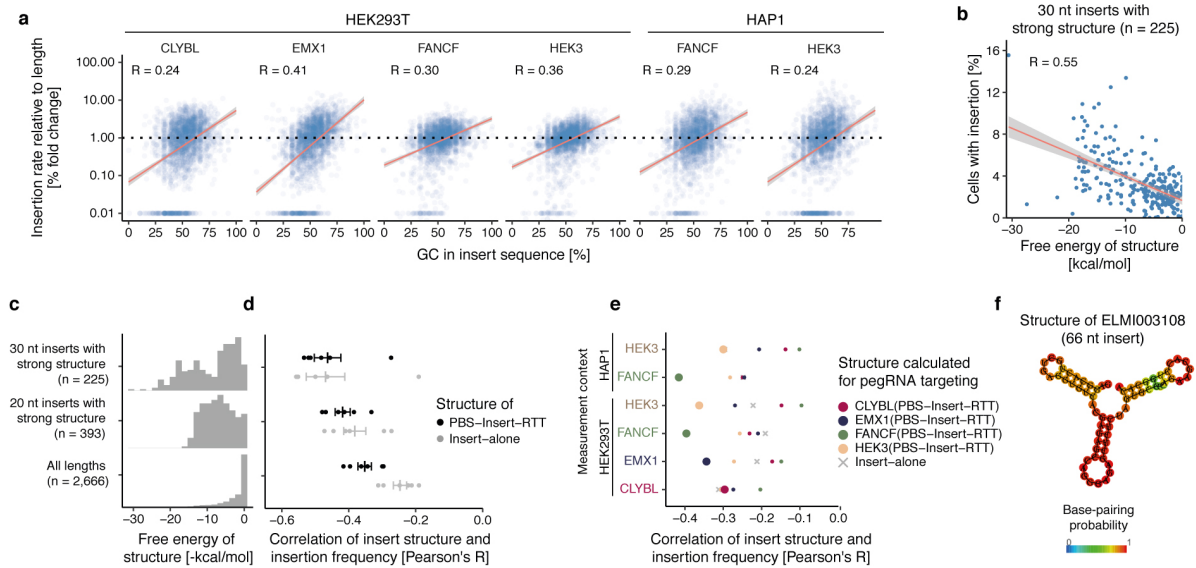

200

201

202

203

204

205

206

207

208

209

210

211

212

213

214

215

216

217

218

219

220

221

222

223

224

**Figure 3. GC content and secondary structure of the insert sequence are positively correlated**

**with insertion rate. a.** Insertion efficiency dependence on GC content. Insertion rate relative to length bin average (y-axis) for inserts with different GC content (x-axis) of individual sequences (markers) at different target sites and cell lines (panels). Red line: linear regression fit; shaded area: 95% posterior confidence interval of the fit. Data represent the average of  $n=3$  biological replicates. **b.** Insert sequence free energy correlation with insertion rate. Percent of cells with insertion (y-axis) for 30 nt sequences in the HEK3 locus in HEK293T cells (markers) with calculated Gibbs free energy ( $\Delta G$ ) from ViennaFold (x-axis). Red line: linear regression fit; shaded area: 95% posterior confidence interval of the fit. Data represent the average of  $n=3$  biological replicates. **c.** Subsets of insertion sequences with fixed length and variable secondary structure. Frequency (y-axis) of insert sequence free energy ( $\Delta G$ , x-axis) for 30 nt (top panel) and 20 nt sequences (middle panel), and the entire library (bottom panel). **d.** Correlation of insertion frequency and insert structure  $\Delta G$  (x-axis) for 30 and 20 nt sequences, and the entire library (y-axis), stratified by whether  $\Delta G$  was calculated for the insert sequence alone (grey) or for the entire 3'-extension, consisting of primer binding site (PBS), insert, and reverse transcription template (RTT; black) for different combinations of target sites and cell lines (markers). Data represents averages from  $n=3$  biological replicates. Bars: mean and standard error of the mean. **e.** Target dependence of pegRNA secondary structure free energy correlation to insertion rate. Correlation (x-axis) between insertion efficiency measured in different target sites and cell lines (y-axis) and pegRNA 3' extension structure free energy calculated for pegRNAs against different target sites (colored markers), as well as insert sequence alone (grey cross). **f.** Example long sequence with successful insertions. The predicted secondary structure of a 66 nt insert sequence (ELMI003108) which was inserted with 1.4% efficiency into the HEK3 locus in HEK293T cells. Colors: base pairing probability.



225 Our library contained 225 and 291 insert sequences of 20 nt and 30 nt respectively, that were  
226 designed to form secondary structures of varying strength, including some sequences with  
227 perfect hairpins. Their secondary structure free energy as quantified by the Vienna fold  $\Delta G$   
228 (more negative  $\Delta G$  values indicate stronger secondary structures)<sup>31,32</sup> was negatively  
229 correlated with insertion efficiency (average Pearson's  $R = -0.38$  and  $-0.50$  for 20 nt and 30 nt  
230 insertions respectively, Figure 3b-d, Supplementary Figure 3c). Even when excluding the  
231 shortest inserts of up to 3 nt, most of the inserted sequences in the library do not form strong  
232 structures (Figure 3c) and the Vienna fold free energy explains less signal variation (average  
233 Pearson's  $R = -0.25$ ). We speculated that more important than the structure of the insert  
234 sequence alone is the structure across the entire pegRNA 3' extension, comprising the primer  
235 binding site and the reverse transcription template, and indeed, more variation was explained  
236 when including the extension (average Pearson's  $R = -0.35$ , Figure 3d, Supplementary Figure  
237 3d-f). Since the extension is specific to the target, this partly explains the differences in  
238 insertion rates we observed across target sites. To quantify this effect, we measured how well  
239 free energies of pegRNA extensions designed for one target site predict insertion efficiency at  
240 another target site. Consistent with a target site-specific effect, the correlation was strongest  
241 when the target site was matching to the 3' extension the structure it was calculated from  
242 (Figure 3e).

243  
244 Combining insert sequence length, GC content and structure explained why some sequences  
245 inserted much better than others, which can help guide the choice of tags to insert. For  
246 example, the long 66 nt ELM1003108 sequence that was inserted in the HEK3 locus at 1.39%  
247 insertion frequency (0.66% on average for the other 10 sequences  $> 66$  nt) had a GC content  
248 of 62% and formed a strong structure alone as well as within the pegRNA context (ViennaFold  
249 free energy =  $-23.8$  and  $-37.5$  respectively, Figure 3f). Other longer sequences that inserted  
250 well relative to their size were recombinase sites, presumably due to their secondary structure  
251 that often contains hairpins (Supplementary Figure 4a,b).

## 252 **CRISPR system effects**

253 Finally, we considered how aspects of the CRISPR/Cas system itself impact insertion rates.  
254 First, it is known that the occurrence of four consecutive thymines acts as a transcription  
255 terminator for RNA polymerase III and strongly impairs guide RNA expression<sup>33,34</sup>. We  
256 confirmed that the average insertion rate for sequences that contain this tetranucleotide was  
257 4.2 to 11.6-fold lower compared to sequences without (Figure 5a), while stretches of four  
258 adenines showed a weaker but significant effect (average 1.5 to 1.8-fold reduction,

259 Supplementary Figure 4c). Overall, 21 of the 24 pegRNAs that were not inserted in any screen  
260 contained at least one instance of the TTTT sequence.

261

262 Second, to disentangle the contribution of the reverse transcription step, we made a prime  
263 editor construct with the nicking Cas9 fused to an engineered feline leukemia virus reverse  
264 transcriptase (MashUp RT - pipettejockey.com) with a similar fidelity to the murine leukemia  
265 virus RT used in PE2. The average insertion rates observed using this construct were 4.6-fold  
266 lower compared to the standard PE2 (0.98% and 4.56% respectively; Figure 4b), but as  
267 correlated to PE2 as another biological replicate (Pearson's  $R=0.80$ ; Figure 4c, Figure 1e),  
268 and with consistent marginal effects of the contributing features (Supplementary Figure 5).  
269 Therefore, the reverse transcriptase used is not a major cause of variation in insertion rate in  
270 our study.

271

272 Including an additional sgRNA to nick the non-edited strand increases editing efficiency as  
273 well as indel formation rate<sup>12</sup>. We next explored how the addition of this extra sgRNA affects  
274 the insertion frequencies of our library. We chose the EMX1 locus in HEK293T cells where we  
275 observed poor insertion efficiencies of 0.28% on average without the nicking guide RNA, and  
276 co-transfected with a nicking guide RNA that targets 77 nt downstream of the pegRNA target<sup>35</sup>.  
277 We found that the extra nick increased the average insertion rate by 5.7-fold to 1.59%, and  
278 moderately increased the indel rate by 1.7-fold to 0.22% (Figure 4b). Importantly, the relative  
279 insertion rates for sequences in the library remained similar, with correlations in line with those  
280 of biological replicates and the other reverse transcriptase (Pearson's  $R=0.84$ , Figure 4d), and  
281 consistent feature impact (Supplementary Figure 5) suggesting the determinants of prime  
282 insertion efficiency we uncovered for PE2 are also valid for PE3.

283

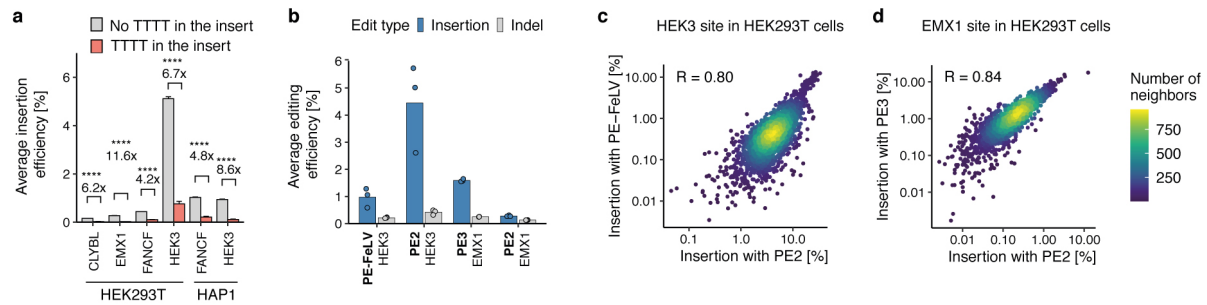

284

285

286

287

288

289

290

291

292

293

294

295

296

297

298

299

300

301

302

303

304

305

306

307

308

309

310

311

**Figure 4. CRISPR system effects.** **a.** Impact of four consecutive thymines. Average insertion rate (y-axis) for different screens (x-axis) stratified by presence of four consecutive thymines (grey: absent; red: present). Comparison: ratio of red bar height. p-values derived from a two-sided student's t-test with all p-values <  $1 \times 10^{-67}$ .  $n=3$  biological replicates. **b.** Editing frequencies for alternative prime editing systems. Mutation frequency (y-axis) for three biological replicate screens (markers) using different prime editor systems (x-axis) stratified by mutation type (blue: insertions; grey: indels). Bar: average of markers. **c.** Impact of an alternative reverse transcriptase. Insertion frequencies at the HEK3 site in HEK293T using the standard MMLV reverse transcriptase (PE2, x-axis) and the FeLV reverse transcriptase (PE-FeLV, y-axis) for different insertion sequences (markers). Colors: number of neighboring data points. Label: Pearson's R.  $n=3$  biological replicates. **d.** As c), but comparing PE3, and at EMX1 site.

### Predicting insertion rates

Given our improved understanding of prime insertion efficiency, we next created a prediction model. We extracted salient features such as insert length, nucleotide composition, and folding energy for each pegRNA, and trained regression models of insertion rates. We chose to use XGBoost (gradient boosted decision trees<sup>36</sup>), as it achieved the best cross-validation performance (Figure 5a), and further evaluated its accuracy on datasets narrowed to individual sites and cell lines (Supplementary Figure 6a). The model generalized well (Supplementary Figure 6b), but we noticed that training on data only from HAP1 experiments resulted in worse performance on the HEK293T and HAP1  $\Delta$ MLH1 lines (average Pearson's R = 0.31 vs 0.49 and 0.50 respectively). Given the observations of mismatch repair importance above, and the lack of repair proficiency as a feature input to the model, we hypothesized that including an experiment-specific and sequence-independent feature to capture this will improve prediction accuracy. Indeed, the model improved substantially when adding MMR status as a feature (increase in Pearson's R > 0.1; paired t-test p <  $10^{-3}$ ; Figure 5b).

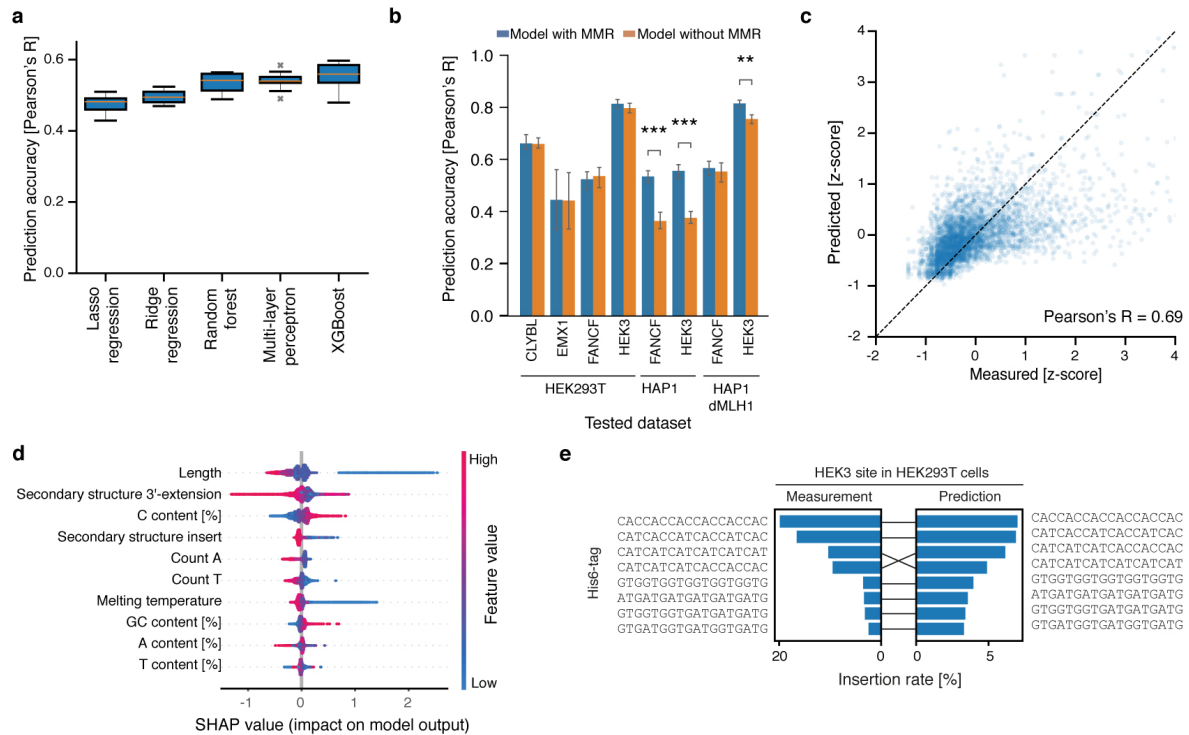

312

313

314

315

316

317

318

319

320

321

322

323

324

325

326

327

328

329

330

331

332

333

**Figure 5. Predicting prime insertion efficiencies.** **a.** Cross-validation performance of different models. Pearson's R between predicted and measured held-out pegRNAs (y-axis) for ten cross-validation folds across a range of models (x-axis). Box: median and quartiles; whiskers: 90th percentile; cross: outlier. **b.** Impact of sequence-independent mismatch repair (MMR) proficiency feature. Pearson's R between measured and predicted insertion rate on held-out pegRNAs (y-axis) on different screens (x-axis) for XGBoost model that includes MMR feature (blue) or not (orange). Whiskers: standard error of mean. Comparison: Student's t-test between models with MMR and without; \*\*\*:  $p < 10^{-3}$ ; \*\*:  $p < 10^{-2}$ . **c.** Concordance of prediction and measurement. Predicted (x-axis) and measured (y-axis) insertion efficiency on the combined dataset for held-out pegRNAs (markers). Label: Pearson's R. Dashed line:  $y=x$ . **d.** Feature importance. Distribution (row y-axis) of SHAP values (x-axis) for features ordered top to bottom by median absolute SHAP value (y-axis). Colors: feature value. **e.** His6-tag insertion rate. Insertion rate (x-axis) for Predicted (right) vs. measured (left) insertion rates of different alternative His6-tags (y-axis) into HEK3 locus in HEK293T cells.

Our final model is trained on data from experiments on all cell lines and target sites, and includes sequence characteristics as well as repair proficiency as features. It predicted insertion rates for unseen insert sequences with high accuracy (Pearson's  $R=0.69$ , Figure 5c), which is very near the limit set by the correlation of biological replicates (average Pearson's  $R=0.76$ ). The features important for prediction<sup>37</sup> reflected the observations above, with insert sequence length, secondary structure of the pegRNA, and nucleotide composition having the largest impact (Figure 5d). We call this method MinsePIE (Modelling insertion efficiency for

334 Prime Insertion Experiments) and make it available at  
335 <https://github.com/julianeweller/MinsePIE>.

336

337 Predictive models inform experiments and help in selecting the components of a desired  
338 insertion. A common application of small sequence insertion is endogenous protein tagging,  
339 and the His6-tag is frequently used to enable purification. The possible tags that give  
340 equivalent amino acid sequences range in codon choice, thus resulting in pegRNAs with  
341 varying secondary structure and nucleotide composition when inserted. Our library contained  
342 8 codon variations of the His6-tag in forward and reverse orientations. The average insertion  
343 difference between the best codon variant and the worst was 13.3-fold, highlighting the  
344 importance of choosing the optimal codon variant for insertion. We withheld the data for all  
345 His6-tags in our library from the training set, and predicted their efficacy of insertion into the  
346 HEK3 locus in HEK293T cells. The versions of the His6-tag that were both predicted and  
347 measured to have the highest insertion rates had the highest cytosine content by using mainly  
348 the CAC histidine codon (Figure 5e). While the predicted preference varied across target  
349 contexts, the His6-tag with the highest predicted insertion rate was within the top two  
350 measured rates in each editing context (Supplementary Figure 6).

## 351 **DISCUSSION**

352 We present the first comprehensive analysis of prime editing insertion efficiencies using 2,666  
353 pegRNAs. We discovered that short sequences insert with predictable frequencies across cell  
354 lines, target sites, and prime editor systems based on their length, GC content and tendency  
355 to form secondary structure. Together, these features enable it to accurately predict variation  
356 in insertion rates, and to choose optimal reagents for writing short stretches of DNA into  
357 genomes.

358

359 We uncovered a complex relation between insertion sequence length and efficiency.  
360 Sequences between 15 and 21 nt generally inserted well, while longer sequences are  
361 incorporated less frequently, but still at moderate efficiencies even for sequences larger than  
362 60 nt. This disparity is potentially due to steric issues for reverse transcription and base pairing  
363 with the unedited strand. The insertion efficiency of sequences shorter than 10 nt was variable,  
364 with high rates in MMR-deficient cell lines (HEK293T, HAP1  $\Delta$ MLH1) but not in MMR-proficient  
365 ones (HAP1). This is consistent with recent findings that MMR antagonizes prime editing<sup>17</sup>.  
366 Longer sequences are less efficiently recognized by MMR<sup>30</sup> and therefore insert better than  
367 short ones in mismatch repair proficient cell lines.

368 We further discovered that stronger secondary structure of the pegRNA 3'-extension led to  
369 higher insertion efficiency. This effect was evident when comparing different inserts into the  
370 same target, but also explained variable rates when attempting to write the same sequence  
371 into different target sites. One potential explanation is that structured pegRNAs are more  
372 protected from digestion by 3'-exonucleases. Indeed, Nelson and Randolph *et. al.* recently  
373 demonstrated that incorporating structured motifs at the 3'-end of pegRNAs improved prime  
374 editing efficiency 3 to 4-fold by preventing degradation of the 3'-extension<sup>18</sup>. Alternatively,  
375 structured inserts could ease pairing of the edited strand with the non-edited strand due to  
376 being sterically smaller via folding onto themselves.

377

378 Our improved understanding of insertion efficiency using the prime editing system naturally  
379 leads to recommendations for experimental design. First, we suggest choosing sequences  
380 with high GC, and especially cytosine content that are prone to form secondary structures.  
381 Sequences whose lengths vary between 15 and 21 nt are well inserted using prime editing  
382 while sequences between 10 and 14 nt are not. Knocking out MLH1 will drastically improve  
383 insertion rates for sequences shorter than 10 nt. To boost the efficiency of short sequence  
384 insertions in mismatch repair proficient contexts, additional silent mutations should be inserted  
385 on the reverse transcriptase template or mismatch repair could be transiently inhibited (as  
386 implemented in PE4 or PE5 systems)<sup>17</sup>.

387

388 These factors can influence the choice of tag and codon. For example, the His-6 tag,  
389 especially if choosing the CAC codon, inserts almost 6 times as well as the next best tag in  
390 our library (Myc-tag). For the correction of pathogenic deletions, our model can help prioritize  
391 targets and pick high efficiency replacement sequences (for example through codon variation).  
392 Our libraries cover many commonly used small sequences and their respective insertion  
393 efficiencies (Supplementary Data 2). For predicting the insertion efficiency of novel  
394 sequences, we provide the MinsePIE algorithm as a command line script.

395

396 We studied four target sites in two cell lines across three prime editor systems and uncovered  
397 both universal and target site-dependent determinants of insertion efficiency. Models trained  
398 specifically on one target site still outperformed predictions on withheld data from the same  
399 target site when compared to predictions on other target sites. Screening a smaller focussed  
400 library across many target sites should help to more fully understand the interactions of target  
401 site and insertion sequences. Moreover, all pegRNAs had a constant primer binding site length  
402 of 13 nt and a reverse transcriptase template length (without insertion) of 34 nt. Given the



403 model based on our sequence features (that implicitly also quantify these factors) generalised  
404 well to unseen pegRNAs, we expect the determinants we uncovered to also broadly hold for  
405 different lengths of primer binding site and reverse transcriptase template.

406

407 The prime editing field is moving rapidly<sup>38</sup>. Diverse applications are already emerging<sup>39</sup> and  
408 some of the most exciting ones are specifically built around insertion of short sequences.  
409 Communicated, but as yet unpublished examples include insertion of recombinase sites using  
410 prime editing to enable directed insertion of large DNA cargo of up to 36 kb<sup>1,2</sup>, as well as clever  
411 utilization of short sequence insertion to generate a molecular recorder for sequential cellular  
412 events<sup>40-42</sup>. Better understanding of how cellular determinants<sup>17</sup> and pegRNA features affect  
413 prime editing rates<sup>14,18</sup> provides a foundation for these advances. Our work adds the important  
414 dimension of short sequences insertions, which hold the promise to both enable sophisticated  
415 genome engineering and to correct thousands of pathogenic mutations.

## 416 **Author contributions**

417 Conceptualized and initiated the study: JK, LP. Performed experiments: EMP with help from:  
418 JK, FL. Analysed the data: JK, JW with help from: AP. Build the machine learning models: JW  
419 with help from: AP. Supervised the project: LP with help from: FL. Wrote the manuscript: JK,  
420 JW, LP with input from all authors.

## 421 **Competing interests**

422 The authors do not declare any competing interests

## 423 **Acknowledgements**

424 We thank Balca R. Mardin and Özdemirhan Serçin for discussions on the discrepancies in  
425 insert rates for short sequences between HEK293T and HAP1 cell lines, and for pointing us  
426 towards the mismatch repair pathway; We thank Thomas Vanderstichele, Matthew Coehlo,  
427 Erica Bello, Jacob Hepkema, Megan Gozzard, Luca Crepaldi and Tom Ellis for discussions  
428 and input on the manuscript. We thank Alexander Klenov for sharing the sequence of the  
429 MashUp Reverse Transcriptase derived from Feline Leukaemia Virus (FeLV). AP, EMP, JK,  
430 JW, and LP were supported by Wellcome (206194). LP was also supported by the Estonian  
431 Centre of Excellence in IT (EXCITE) (TK148).

## 432 **METHODS**

### 433 **Mammalian cell culture**

434 The human HEK293T cell line was purchased from AMS Biotechnology (EP-CL-0005). The  
435 HAP1 WT cell line was provided by Andrew Waters (Wellcome Sanger Institute) and the HAP1  
436  $\Delta$ MLH1 cell line was purchased from Horizon discovery (HZGHC000343c022). HEK293T cells  
437 were cultured in DMEM (Invitrogen) and HAP1 cells in IMDM (Invitrogen), both supplemented  
438 with 10% FCS (Invitrogen), 2 mM glutamine (Invitrogen), 100 U/ml penicillin and 100 mg/ml  
439 streptomycin (Invitrogen) at 37 °C and 5% CO<sub>2</sub>.

440

### 441 **Primers**

442 All primers used in this study are listed in Supplementary Table 1.

443

### 444 **Library design**

445 The insert sequence library contained 2,666 sequences, made up from useful molecular  
446 biology sequences, the eukaryotic motif library (ELM) and sequences with strong secondary  
447 structure. The utility sequences were hand-picked for their usefulness in molecular biology.  
448 The ELM instances library with the corresponding fasta file of the genes was downloaded from  
449 [elm.eu.org/instances.html?q=\\*26,27](http://elm.eu.org/instances.html?q=*26,27) on 2020/11/19 and filtered to only contain sequences from  
450 “homo sapiens” that are longer than 1 amino acid. The amino acid motifs were extracted from  
451 the fasta file based on the indicated start and end sites. Finally, the amino acid motifs were  
452 reverse translated into DNA sequence using the ‘reversetranslate’ R package (version 1.0.0)  
453 and using the most frequent codon from the homo sapiens codon table. For the secondary  
454 structure library, 100,000 random DNA sequences of 20 and 30 nt length were generated  
455 (RBioinf::randDNA function; version 1.48.0) and their secondary structure calculated (see  
456 insert sequence structure section). The sequences were distributed into 10 bins based on the  
457 strength of their secondary structure and 20 sequences were randomly picked from each  
458 structure bin to be included in the library. Finally, 30 random perfect 20 and 30 nt RNA hairpins  
459 were generated and amended to the secondary structure library. The combined library of  
460 insert sequences is included as Supplementary Data 1. The insert sequences were then  
461 flanked with primer binding sites, random nucleotide stuffer sequence for shorter inserts,  
462 BsmBI sites and target vector compatible overhangs, resulting in 11,166 sequences of 199 nt  
463 (Supplementary Data 3). The oligonucleotide library was ordered from Twist Biosciences.

464

### 465 **Plasmid cloning**

466 *pCMV-PE2-P2A-PuroR* was generated by replacing eGFP from pCMV-PE2-P2A-GFP  
467 (Addgene 132776) with PuroR. Therefore, a gene fragment containing parts of the MMLV  
468 reverse transcriptase and the puromycin resistance gene was ordered from IDT  
469 (Supplementary Table 3). The gene fragment and pCMV-PE2-P2A-GFP were digested using  
470 AgeI, purified with the Monarch PCR & DNA Cleanup Kit (NEB) and ligated with T4 DNA ligase  
471 (NEB). 2  $\mu$ l of the ligation product was transformed into bacteria using XL10-Gold  
472 Ultracompetent Cells (Agilent) according to the manufacturer's protocol. Plasmid DNA was  
473 isolated using the Plasmid Plus Midi Kit (Qiagen).

474  
475 *pCMV-PE-FeLV-P2A-EGFP* was generated by replacing the MMLV coding sequence  
476 between the XTEN linker and the 2A cleavage peptide with a synthesised gene fragment from  
477 IDT using Gibson Assembly that encodes an IDT human codon optimised version of the  
478 MashUp reverse transcriptase (pipettejockey.com) that is engineered from the Feline  
479 Leukaemia Virus (UniProt Q85521).

480  
481 *pLentiGuide-Blast* was generated by replacing the puromycin resistance gene from  
482 Lenti\_gRNA-Puro (Addgene 84752) with a blasticidin resistance gene. A gene fragment  
483 containing parts of the EF1a promoter and the blasticidin resistance gene was ordered from  
484 Twist Biosciences (Supplementary Table 3). The gene fragment and Lenti\_gRNA-Puro were  
485 digested using FseI (NEB) and MluI-HF (NEB), purified with the Monarch PCR & DNA Cleanup  
486 Kit (NEB) and ligated with T4 DNA ligase (NEB). 2  $\mu$ l of the ligation product was transformed  
487 into bacteria using XL10-Gold Ultracompetent Cells (Agilent) according to the manufacturer's  
488 protocol. Plasmid DNA was isolated using the Qiagen Spin Miniprep Kit.

489

#### 490 **Library cloning**

491 First, a separate, site-specific backbone was cloned for each target site. A gene fragment was  
492 ordered containing the protospacer, guide RNA scaffold, parts of the reverse transcriptase  
493 template and primer binding site, a stuffer sequence flanked with BsmBI sites for insert library  
494 insertion and the T7 terminator motif (Supplementary table 3). 100 ng of the gene fragments  
495 were digested with BsaI-HFv2 (NEB) and purified with the Monarch PCR & DNA Cleanup Kit  
496 (NEB). The pLentiGuide-Blast plasmid was digested with BsmBI-V2 (NEB) at 55°C for 8h  
497 followed by 20 min heat inactivation at 80°C and gel purified using the QIAEX II Gel Extraction  
498 Kit (Qiagen). The gene fragments were ligated into the backbone using T4 DNA ligase (NEB)  
499 and transformed into XL10-Gold Ultracompetent bacteria (Agilent). The plasmids were purified  
500 with Qiagen Spin Miniprep Kit.

501

502 Second, pegRNA insert libraries were inserted into the site-specific backbones. The insert  
503 libraries were synthesized as 199 nt oligo pools (Twist BioSciences) and amplified using KAPA  
504 HiFi HotStart ReadyMix (Roche). Libraries for individual target sites were amplified with  
505 separate primers (Supplementary Table 1). The products were purified using the Monarch  
506 PCR & DNA Cleanup Kit, digested with BsmBI-v2 at 55°C for 4h and heat inactivated at 80°C  
507 for 20 min alongside 5 µg of site-specific plasmids. The digested oligos were purified using  
508 the Monarch PCR & DNA Cleanup Kit. The vectors were treated with quick CIP (NEB) for 15  
509 minutes at 37°C and then purified using QIAquick PCR Purification Kit (Qiagen). Inserts were  
510 ligated into vectors using Golden Gate assembly. A 1:3 molar ratio of insert and vector were  
511 mixed with BsmBI-v2 and T4 DNA ligase and incubated in a thermocycler for 30 cycles,  
512 alternating between 5 minutes at 42°C and 5 min at 16°C and finishing with a heat inactivation  
513 step at 60°C for 5 min. The ligation products were purified with Monarch PCR & DNA Cleanup  
514 Kit and electroporated into MegaX DH10B T1R Electrocomp Cells (Thermo Fisher) according  
515 to manufacturer's protocol. The bacteria were grown overnight in liquid culture and plasmid  
516 was extracted using the Plasmid Plus Midi Kit. The spacer sequences, primer binding sites,  
517 and reverse transcriptase templates (without insertions) are attached as Supplementary  
518 Table 2).

519

## 520 **Lentivirus production**

521 Lentivirus was produced in HEK293FT cells that were transfected with Lipofectamine LTX  
522 (Invitrogen). 5.4 µg of a lentiviral vector, 5.4 µg of psPax2 (Addgene 12260), 1.2 µg of pMD2.G  
523 (Addgene 12259) were mixed in 3 ml Opti-MEM together with 12 µl PLUS reagent and  
524 incubated for 5 min at room temperature. 36 µl of the LTX reagent was added and the mix  
525 was incubated for another 30 min at room temperature. 3 ml of the transfection mix was then  
526 added to 80% confluent cells in 10 ml DMEM media in a 10-cm dish. After 48h the supernatant  
527 was collected and stored at 4°C. Fresh media was added to the cells and harvested 24h later.  
528 The two harvests were kept separate. For virus titration, Lenti-X GoStix Plus (Takara) was  
529 used following the manufacturer's protocol.

530

## 531 **pegRNA insertion screens**

532 *Infection with pegRNA library.* All cell lines were infected with the pegRNA library aiming at a  
533 multiplicity of infection (MOI) of 0.5 and a guide coverage of > 1000x. Each screen was  
534 performed in 3 biological replicates and independently infected. To achieve this, 6x10<sup>6</sup> cells  
535 were plated in three wells of a six well plate and spin infected for 15-30 mins at 2000 rpm.

536 Following infection, cells were resuspended and replated at  $2 \times 10^4$  cells/cm<sup>2</sup>. Cells were  
537 cultured for 7 days and selected for pegRNA integration with 10  $\mu$ g/ml blasticidin. Cells were  
538 passaged at day 3 post-infection and a higher coverage than at the time of infection was  
539 maintained.

540

541 *Transfection with prime editors.* HEK293T cells were seeded at a concentration  $6.9 \times 10^4$   
542 cells/cm<sup>2</sup> to a 15-cm dish. The next day the media was replaced with fresh media and the cells  
543 were transfected using Lipofectamine LTX reagent. Next, 72  $\mu$ g PE-Puro or PE-FeLV plasmid  
544 were mixed with 8  $\mu$ g pCS2-GFP and 40  $\mu$ l Lipofectamine P3000 (Invitrogen) in 3.2 ml Opti-  
545 Mem (Gibco). In another tube, 40  $\mu$ l of Lipofectamine 3000 and 160  $\mu$ l Lipofectamine LTX  
546 were mixed in 3.2 ml Opti-Mem. The solutions were mixed together, incubated for 30 minutes  
547 at room temperature and then added onto the cells. For PE3, an additional 6  $\mu$ g of nicking  
548 guide RNA was added.

549

550 Hap1 and HAP1  $\Delta$ MLH1 cells were seeded at a concentration of  $9.3 \times 10^4$  cells/cm<sup>2</sup> into two  
551 T75-flasks. The following day, the media was refreshed one hour before transfection. Cells  
552 were transfected using Xfect Transfection Reagent (Takara). Next, 72  $\mu$ g PE-Puro plasmid  
553 was mixed with 8  $\mu$ g pCS2-GFP and Xfect Reaction Buffer to a total volume of 750  $\mu$ l. To the  
554 reaction, 48  $\mu$ l of Xfect Polymer was added and incubated at room temperature for 10  
555 minutes. The mixture was then added onto the cells. Media was changed 4 h after transfection.  
556 One day after transfections, 2  $\mu$ g/ml of puromycin was added to the cells to start selection.  
557 Cells were kept in selection for 3 days and harvested 5 days after transfection.

558

### 559 **DNA extraction and library preparation for next generation sequencing**

560 Genomic DNA extraction and sequencing library preparation for screens were done as  
561 described in Allen et al., 2019<sup>10</sup>. Briefly, cell pellets were resuspended in TAIL BUFFER A  
562 (100 mM Tris-HCl, 5 mM EDTA, 200 mM NaCl) and then mixed with 1 volume of TAIL BUFFER  
563 B (100 mM Tris-HCl, 5 mM EDTA, 200 mM NaCl, 0.4% SDS) supplemented with freshly  
564 thawed Proteinase K (20 mg/ml final). The lysate was incubated overnight at 56°C. On the  
565 next day, RNase A was added to a final concentration of 10  $\mu$ g/ml and incubated at 37°C for  
566 30 min - 4 h. 1 volume of isopropanol was added and the DNA spooled on a sterile inoculation  
567 loop. The DNA was washed three times by dipping into consecutive 5 ml tubes containing  
568 70% ethanol. The DNA was air dried for 5-10 mins and resuspended in TE buffer (pH 8.0).

569

570 For each screen, two independent amplicons were generated by PCR using Q5 Hot Start  
571 High-Fidelity 2X Master Mix (NEB). One amplicon for the targeted locus and one amplicon of  
572 the pegRNA locus (primers listed in Supplementary Table 1, staggered forward primers were  
573 used to ensure complexity for sequencing). To ensure coverage for each sample, 40 µg of  
574 gDNA was used as template and each PCR reaction was run in 50 µl aliquots containing no  
575 more than 5 µg DNA. The PCR reactions were column-purified using the QIAquick PCR  
576 Purification Kit (Qiagen). Sequencing adaptors and barcodes were added with a second round  
577 of PCR using the KAPA HiFi HotStart ReadyMix (Roche), primers P3 and P4 (Supplementary  
578 Table 1) and 1 ng of template DNA. Amplicons were purified with Agencourt AMPure XP beads  
579 in 0.7:1 ratio (beads to PCR reaction volume) and quantified with the Quant-iT™ High-  
580 Sensitivity dsDNA Assay Kit (Invitrogen). The amplicons were pooled together and sequenced  
581 on the Illumina HiSeq 2500 using HiSeq Rapid SBS Kit v2 (500 cycles, no phiX addition).

582

### 583 **Generating read count tables**

584 Paired forward and reverse reads from illumina sequencing were merged using PEAR v0.9.11.  
585 Data for the same screen but from different sequencing lanes was concatenated. The resulting  
586 merged fastq files were processed using a custom R script (read\_match\_pegRNAs.R in  
587 Supplementary Information). First, DNA sequences were trimmed to contain the 10 nt up and  
588 downstream of the nick site (for target site amplicon) or to contain 15 nt up and downstream  
589 of the nick site (pegRNA amplicon). On average, 98% of reads were matched for the target  
590 site amplicon and 84% for the pegRNA amplicon. The trimmed sequences were then matched  
591 to each insert in the pegRNA library in the context of 10 nt target site (for target site amplicon)  
592 or in the context of 15 nt pegRNA plasmid (pegRNA amplicon), requiring 0 mismatches.  
593 Adding the context is to ensure that only insertions at the correct location are considered. On  
594 average 92% of reads were matched to the unedited locus or an insertion for both the target  
595 site amplicon and the pegRNA amplicon. The read count tables are attached as  
596 Supplementary Data 2.

597

### 598 **Combining replicates**

599 We filtered out pegRNAs where any replicate had fewer than 10 reads in the pegRNA  
600 amplicon mapping to it. Across the screens, between 39 and 174 pegRNAs did not pass this  
601 minimum requirement, and were discarded from further analysis (1.5-6.5%, Supplementary  
602 Figure 1d). pegRNA abundance in the screens correlated with their abundance in the plasmid  
603 library (range of Pearson's R across all samples 0.84 to 0.96, Supplementary Figure 1e). Insert  
604 counts were normalized to frequencies by dividing the reads for each insert by the number of



605 reads in each screen. Insertion efficiencies were calculated for each replicate and screen by  
606 dividing the target insert frequency by the pegRNA insert frequency. Finally, insertion  
607 efficiencies were averaged across replicates. The script used to combine replicates is  
608 attached in the supplementary information as 'combine\_replicates.R'. Insertion efficiencies  
609 were normalized (z-score) between screens and replicates by subtracting the corresponding  
610 mean insertion efficiency from each individual insertion efficiency and dividing it by the  
611 standard deviation of the insertion efficiency.

612

### 613 **Mutation rates around the insertion site and indel detection**

614 The fastq reads of the target sites were trimmed by matching a stretch of ten nucleotides 60  
615 nt up and downstream of the nicking site (CLYBL: TAGGGCTGGA, CAGAGTTCCA; EMX1:  
616 GAGGACAAAG, ATGGGGAGGA; FANCF: GTCTCCAAGG, AGCACCTGGG; HEK3:  
617 CTTTTTTTCT, AGCTTTTCCT). Occurrence of library insertions was detected by pattern  
618 matching the trimmed reads for library sequences. Going from outside to inside (with the  
619 nicking site being between the two innermost nucleotides), the occurrence of the four  
620 nucleotides was counted at every position. There is a non-reference SNP (G>A) in HEK293T  
621 cells for 2 of 3 alleles at position +9. The RT template on the pegRNA corresponds to the  
622 sequence of the minor allele (A). For indel detection, the trimmed reads were filtered in a  
623 series of steps. First, sequences with insertions at the nick site that perfectly match a  
624 sequence in the insert libraries were removed (this also means that our method cannot detect  
625 single/double/triple nucleotide insertions at the nick site because our library contains all  
626 possible singlets/doublets/triplets). Second, sequences which contained 'N' were removed.  
627 Third, sequences with a perfectly preserved sequence around the cut site were removed.  
628 Fourth, sequences that are 120 nt long were removed (120 nt corresponds to the length of a  
629 sequence without indels). The remaining sequences were classified as indels. The scripts  
630 used to call mutation rates and indels are attached in the Supplementary Information as  
631 'find\_SNVs.R' and 'find\_indels.R'.

632

### 633 **Data analysis**

634 Length residuals were calculated by dividing sequences into length bins and dividing the  
635 insertion rate by the median insertion rate across the length bin. The length bins consisted of  
636 sequences from 1-4, 5-9, 10-14, 30-39, 40-49, 50-59, and 60-69. The sequences with lengths  
637 above 30 nt were divided into length bins of 10 nt because there were fewer longer sequences  
638 in the library. Melting temperature for the insert sequence was calculated using  
639 SeqUtils.MeltingTemp.Tm\_NN from biopython. The Vienna fold (VF) algorithm<sup>31,32</sup> was used

640 to calculate the tendency of insert sequences to form secondary structures. RNA fold (version  
641 2.4.16) was run on the insert sequences alone or on the insert sequences in context of the 13  
642 nt PBS and 34 nt RT template with the --noPS parameter.

643

## 644 **Modelling**

645 Categorical features were one-hot encoded. Scikit-learn models were applied using default  
646 parameters, if not stated otherwise. Lasso regression was performed with alpha = 0.1; Ridge  
647 regression was performed with alpha of 0.03 and Stochastic Average Gradient descent;  
648 Random forest had a maximum depth of 4 and 100 estimators; Multilayer perceptron regressor  
649 with 100 hidden layers was trained with 500 maximum iterations at a constant learning rate of  
650 0.001 and 'lbfgs' solver. Gradient boosted tree from XGBoost<sup>36</sup> was trained with a minimum  
651 loss reduction of 0.1, 100 trees, a learning rate of 0.1, maximum depth of 5, no L1  
652 regularization on weights, 0.375 L2 regularization on weights, and a 0.95 subsample ratio of  
653 columns when constructing each tree. For training, unique insert sequences were split  
654 randomly into training and test sequences at a ratio of 0.8. Measurements for different target  
655 sites and cell lines were assigned into training and test data based on the grouping of insert  
656 sequences. For 10-fold cross validation, insert sequences were split randomly for every fold  
657 validation. The model was trained and predictions were evaluated using Pearson's R based  
658 on the correlation between test data and corresponding predictions. SHapley Additive  
659 exPlanations (SHAP) values for the model and feature importance for the prediction of specific  
660 outcomes were calculated using the SHAP TreeExplainer and explainerModel<sup>37</sup>.

661

## 662 **Statistics and reproducibility**

663 The *n* numbers denoted in the figure legends refer to independent experiments that were  
664 separately infected with the pegRNA library. No statistical methods were used to predetermine  
665 sample size. The experiments were not randomized and the investigators were not blinded to  
666 allocation during experiments and outcome assessment.

667

## 668 **Data and material availability**

669 Read count tables for all screens, mutation frequencies at each position, sequences with  
670 indels and scripts necessary to reproduce the analysis are attached in the Supplementary  
671 Information. The pCMV-PE2-P2A-PuroR and pLentiGuide\_BlastR plasmids will be made  
672 available on AddGene. Scripts and models are made available on  
673 <https://github.com/julianeweller/MinsePIE>.

674

## 675 **Software**

676 PEAR (0.9.11); Python (3.8.10); Python packages: Biopython (1.79), scikit-learn (0.24.2),  
677 scipy (1.5.3), shap (0.39.0), statannot (0.2.3), XGBoost (1.4.0); R (4.0.2); RNA fold (2.4.16);  
678 R packages: Broom (0.7.9), ggpointdensity (0.1.0), RBioinf (1.48.0), reversetranslate (1.0.0),  
679 ShortRead (1.46.0), spgs (1.0-3), Tidyverse (1.3.1), Viridis (0.6.1).

680

## 681 **REFERENCES**

- 682 1 Anzalone, A. V. *et al.* Programmable large DNA deletion, replacement, integration,  
683 and inversion with twin prime editing and site-specific recombinases. *bioRxiv*,  
684 2021.2011.2001.466790, doi:10.1101/2021.11.01.466790 (2021).
- 685 2 Ioannidi, E. I. *et al.* Drag-and-drop genome insertion without DNA cleavage with  
686 CRISPR-directed integrases. *bioRxiv*, 2021.2011.2001.466786,  
687 doi:10.1101/2021.11.01.466786 (2021).
- 688 3 Landrum, M. J. *et al.* ClinVar: public archive of interpretations of clinically relevant  
689 variants. *Nucleic Acids Res* **44**, D862-868, doi:10.1093/nar/gkv1222 (2016).
- 690 4 Landrum, M. J. *et al.* ClinVar: improving access to variant interpretations and  
691 supporting evidence. *Nucleic Acids Res* **46**, D1062-D1067, doi:10.1093/nar/gkx1153  
692 (2018).
- 693 5 Geurts, M. H. *et al.* Evaluating CRISPR-based prime editing for cancer modeling and  
694 CFTR repair in organoids. *Life Sci Alliance* **4**, doi:10.26508/lsa.202000940 (2021).
- 695 6 Schene, I. F. *et al.* Prime editing for functional repair in patient-derived disease  
696 models. *Nat Commun* **11**, 5352, doi:10.1038/s41467-020-19136-7 (2020).
- 697 7 Drumm, M. L., Ziady, A. G. & Davis, P. B. Genetic variation and clinical heterogeneity  
698 in cystic fibrosis. *Annu Rev Pathol* **7**, 267-282, doi:10.1146/annurev-pathol-011811-  
699 120900 (2012).
- 700 8 Zielenski, J. & Tsui, L. C. Cystic fibrosis: genotypic and phenotypic variations. *Annu*  
701 *Rev Genet* **29**, 777-807, doi:10.1146/annurev.ge.29.120195.004021 (1995).
- 702 9 Leibowitz, M. L. *et al.* Chromothripsis as an on-target consequence of CRISPR-Cas9  
703 genome editing. *Nat Genet* **53**, 895-905, doi:10.1038/s41588-021-00838-7 (2021).
- 704 10 Allen, F. *et al.* Predicting the mutations generated by repair of Cas9-induced double-  
705 strand breaks. *Nat Biotechnol*, doi:10.1038/nbt.4317 (2018).
- 706 11 Kosicki, M., Tomberg, K. & Bradley, A. Repair of double-strand breaks induced by  
707 CRISPR-Cas9 leads to large deletions and complex rearrangements. *Nat Biotechnol*  
708 **36**, 765-771, doi:10.1038/nbt.4192 (2018).
- 709 12 Anzalone, A. V. *et al.* Search-and-replace genome editing without double-strand  
710 breaks or donor DNA. *Nature* **576**, 149-157, doi:10.1038/s41586-019-1711-4 (2019).
- 711 13 Anzalone, A. V., Koblan, L. W. & Liu, D. R. Genome editing with CRISPR-Cas nucleases,  
712 base editors, transposases and prime editors. *Nat Biotechnol* **38**, 824-844,  
713 doi:10.1038/s41587-020-0561-9 (2020).
- 714 14 Kim, H. K. *et al.* Predicting the efficiency of prime editing guide RNAs in human cells.  
715 *Nat Biotechnol* **39**, 198-206, doi:10.1038/s41587-020-0677-y (2021).
- 716 15 Kweon, J. *et al.* Engineered prime editors with PAM flexibility. *Mol Ther* **29**, 2001-  
717 2007, doi:10.1016/j.yymthe.2021.02.022 (2021).

- 718 16 Liu, Y. *et al.* Efficient generation of mouse models with the prime editing system. *Cell*  
719 *Discov* **6**, 27, doi:10.1038/s41421-020-0165-z (2020).
- 720 17 Chen, P. J. *et al.* Enhanced prime editing systems by manipulating cellular  
721 determinants of editing outcomes. *Cell* **184**, 5635-5652 e5629,  
722 doi:10.1016/j.cell.2021.09.018 (2021).
- 723 18 Nelson, J. W. *et al.* Engineered pegRNAs improve prime editing efficiency. *Nat*  
724 *Biotechnol*, doi:10.1038/s41587-021-01039-7 (2021).
- 725 19 Doench, J. G. *et al.* Optimized sgRNA design to maximize activity and minimize off-  
726 target effects of CRISPR-Cas9. *Nat Biotechnol* **34**, 184-191, doi:10.1038/nbt.3437  
727 (2016).
- 728 20 Meier, J. A., Zhang, F. & Sanjana, N. E. GUIDES: sgRNA design for loss-of-function  
729 screens. *Nat Methods* **14**, 831-832, doi:10.1038/nmeth.4423 (2017).
- 730 21 Kim, H. K. *et al.* SpCas9 activity prediction by DeepSpCas9, a deep learning-based  
731 model with high generalization performance. *Sci Adv* **5**, eaax9249,  
732 doi:10.1126/sciadv.aax9249 (2019).
- 733 22 Arbab, M. *et al.* Determinants of Base Editing Outcomes from Target Library Analysis  
734 and Machine Learning. *Cell* **182**, 463-480 e430, doi:10.1016/j.cell.2020.05.037  
735 (2020).
- 736 23 Pallaseni, A. *et al.* Predicting base editing outcomes using position-specific sequence  
737 determinants. *bioRxiv*, 2021.2009.2016.460622, doi:10.1101/2021.09.16.460622  
738 (2021).
- 739 24 Song, M. *et al.* Sequence-specific prediction of the efficiencies of adenine and  
740 cytosine base editors. *Nat Biotechnol* **38**, 1037-1043, doi:10.1038/s41587-020-0573-  
741 5 (2020).
- 742 25 Feng, S. *et al.* Improved split fluorescent proteins for endogenous protein labeling.  
743 *Nat Commun* **8**, 370, doi:10.1038/s41467-017-00494-8 (2017).
- 744 26 Dinkel, H. *et al.* The eukaryotic linear motif resource ELM: 10 years and counting.  
745 *Nucleic Acids Res* **42**, D259-266, doi:10.1093/nar/gkt1047 (2014).
- 746 27 Puntervoll, P. *et al.* ELM server: A new resource for investigating short functional  
747 sites in modular eukaryotic proteins. *Nucleic Acids Res* **31**, 3625-3630,  
748 doi:10.1093/nar/gkg545 (2003).
- 749 28 Cerbini, T. *et al.* Transcription activator-like effector nuclease (TALEN)-mediated  
750 CLYBL targeting enables enhanced transgene expression and one-step generation of  
751 dual reporter human induced pluripotent stem cell (iPSC) and neural stem cell (NSC)  
752 lines. *PLoS One* **10**, e0116032, doi:10.1371/journal.pone.0116032 (2015).
- 753 29 Trojan, J. *et al.* Functional analysis of hMLH1 variants and HNPCC-related mutations  
754 using a human expression system. *Gastroenterology* **122**, 211-219,  
755 doi:10.1053/gast.2002.30296 (2002).
- 756 30 Gupta, S., Gellert, M. & Yang, W. Mechanism of mismatch recognition revealed by  
757 human MutSbeta bound to unpaired DNA loops. *Nat Struct Mol Biol* **19**, 72-78,  
758 doi:10.1038/nsmb.2175 (2011).
- 759 31 Gruber, A. R., Lorenz, R., Bernhart, S. H., Neubock, R. & Hofacker, I. L. The Vienna  
760 RNA websuite. *Nucleic Acids Res* **36**, W70-74, doi:10.1093/nar/gkn188 (2008).
- 761 32 Hofacker, I. L. Vienna RNA secondary structure server. *Nucleic Acids Res* **31**, 3429-  
762 3431, doi:10.1093/nar/gkg599 (2003).
- 763 33 Chen, B. *et al.* Dynamic imaging of genomic loci in living human cells by an optimized  
764 CRISPR/Cas system. *Cell* **155**, 1479-1491, doi:10.1016/j.cell.2013.12.001 (2013).

- 765 34 Porrua, O., Boudvillain, M. & Libri, D. Transcription Termination: Variations on  
766 Common Themes. *Trends Genet* **32**, 508-522, doi:10.1016/j.tig.2016.05.007 (2016).
- 767 35 Liu, P. *et al.* Improved prime editors enable pathogenic allele correction and cancer  
768 modelling in adult mice. *Nat Commun* **12**, 2121, doi:10.1038/s41467-021-22295-w  
769 (2021).
- 770 36 Chen, T. & Guestrin, C. in *Proceedings of the 22nd ACM SIGKDD International*  
771 *Conference on Knowledge Discovery and Data Mining* 785–794 (Association for  
772 Computing Machinery, San Francisco, California, USA, 2016).
- 773 37 Lundberg, S. & Lee, S.-I. A Unified Approach to Interpreting Model Predictions.  
774 arXiv:1705.07874 (2017).  
775 <<https://ui.adsabs.harvard.edu/abs/2017arXiv170507874L>>.
- 776 38 Scholefield, J. & Harrison, P. T. Prime editing - an update on the field. *Gene Ther* **28**,  
777 396-401, doi:10.1038/s41434-021-00263-9 (2021).
- 778 39 Erwood, S. *et al.* Saturation variant interpretation using CRISPR prime editing.  
779 *bioRxiv*, 2021.2005.2011.443710, doi:10.1101/2021.05.11.443710 (2021).
- 780 40 Choi, J. *et al.* A temporally resolved, multiplex molecular recorder based on  
781 sequential genome editing. *bioRxiv*, 2021.2011.2005.467388,  
782 doi:10.1101/2021.11.05.467388 (2021).
- 783 41 Chen, W. *et al.* Multiplex genomic recording of enhancer and signal transduction  
784 activity in mammalian cells. *bioRxiv*, 2021.2011.2005.467434,  
785 doi:10.1101/2021.11.05.467434 (2021).
- 786 42 Loveless, T. B. *et al.* Molecular recording of sequential cellular events into DNA.  
787 *bioRxiv*, 2021.2011.2005.467507, doi:10.1101/2021.11.05.467507 (2021).  
788





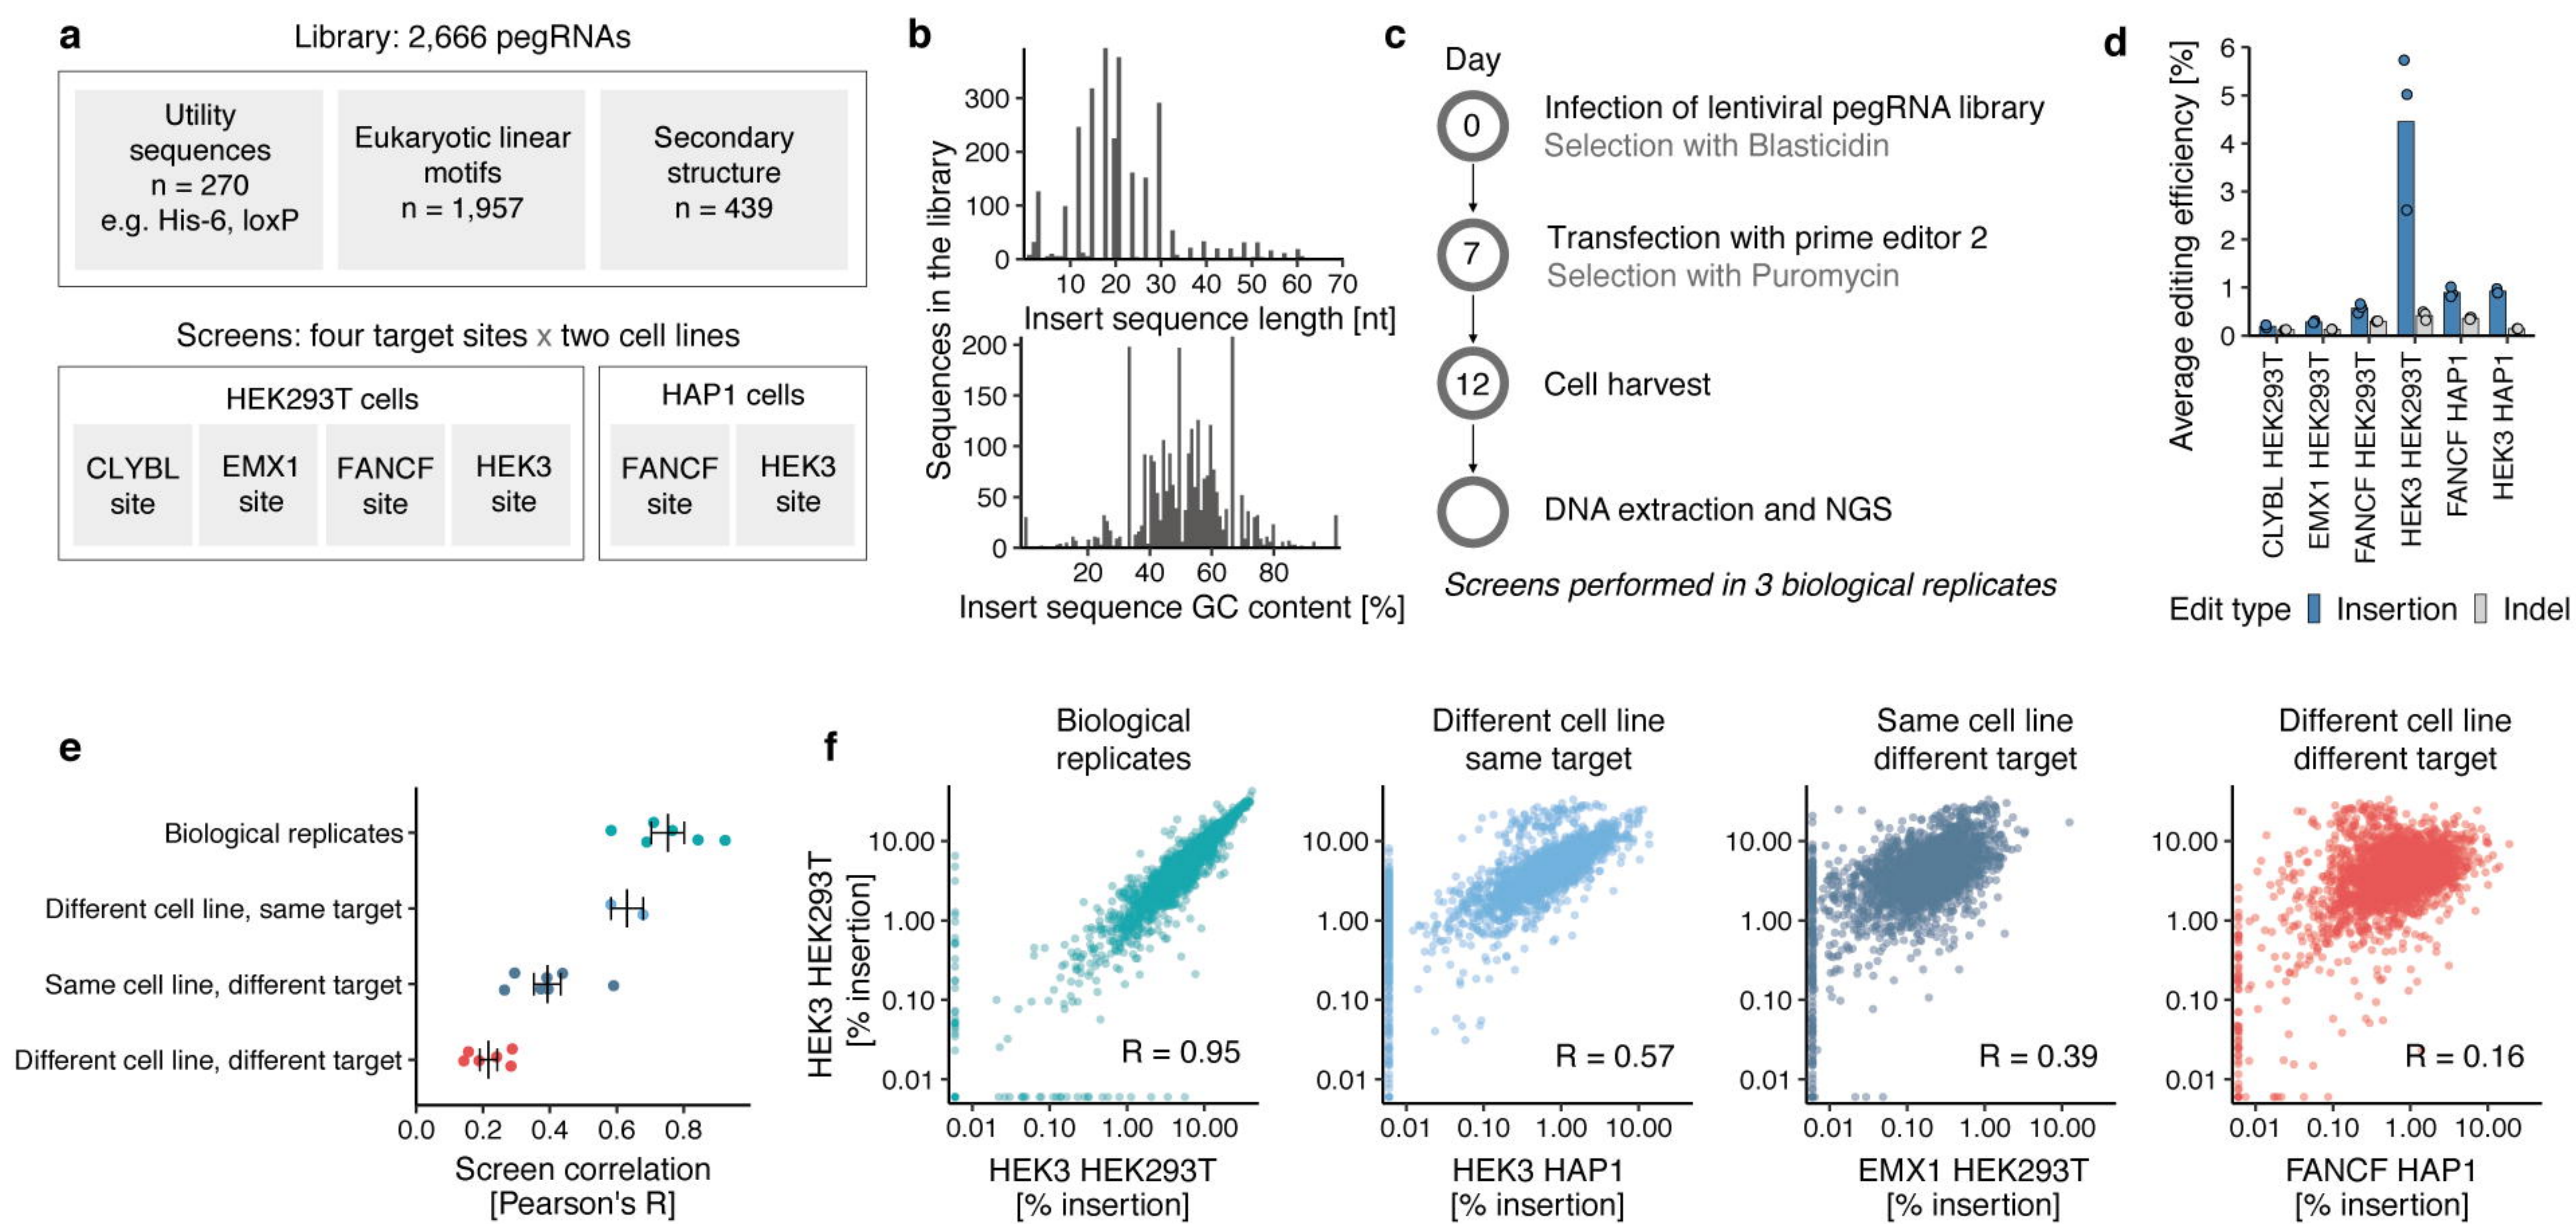

Figure 1



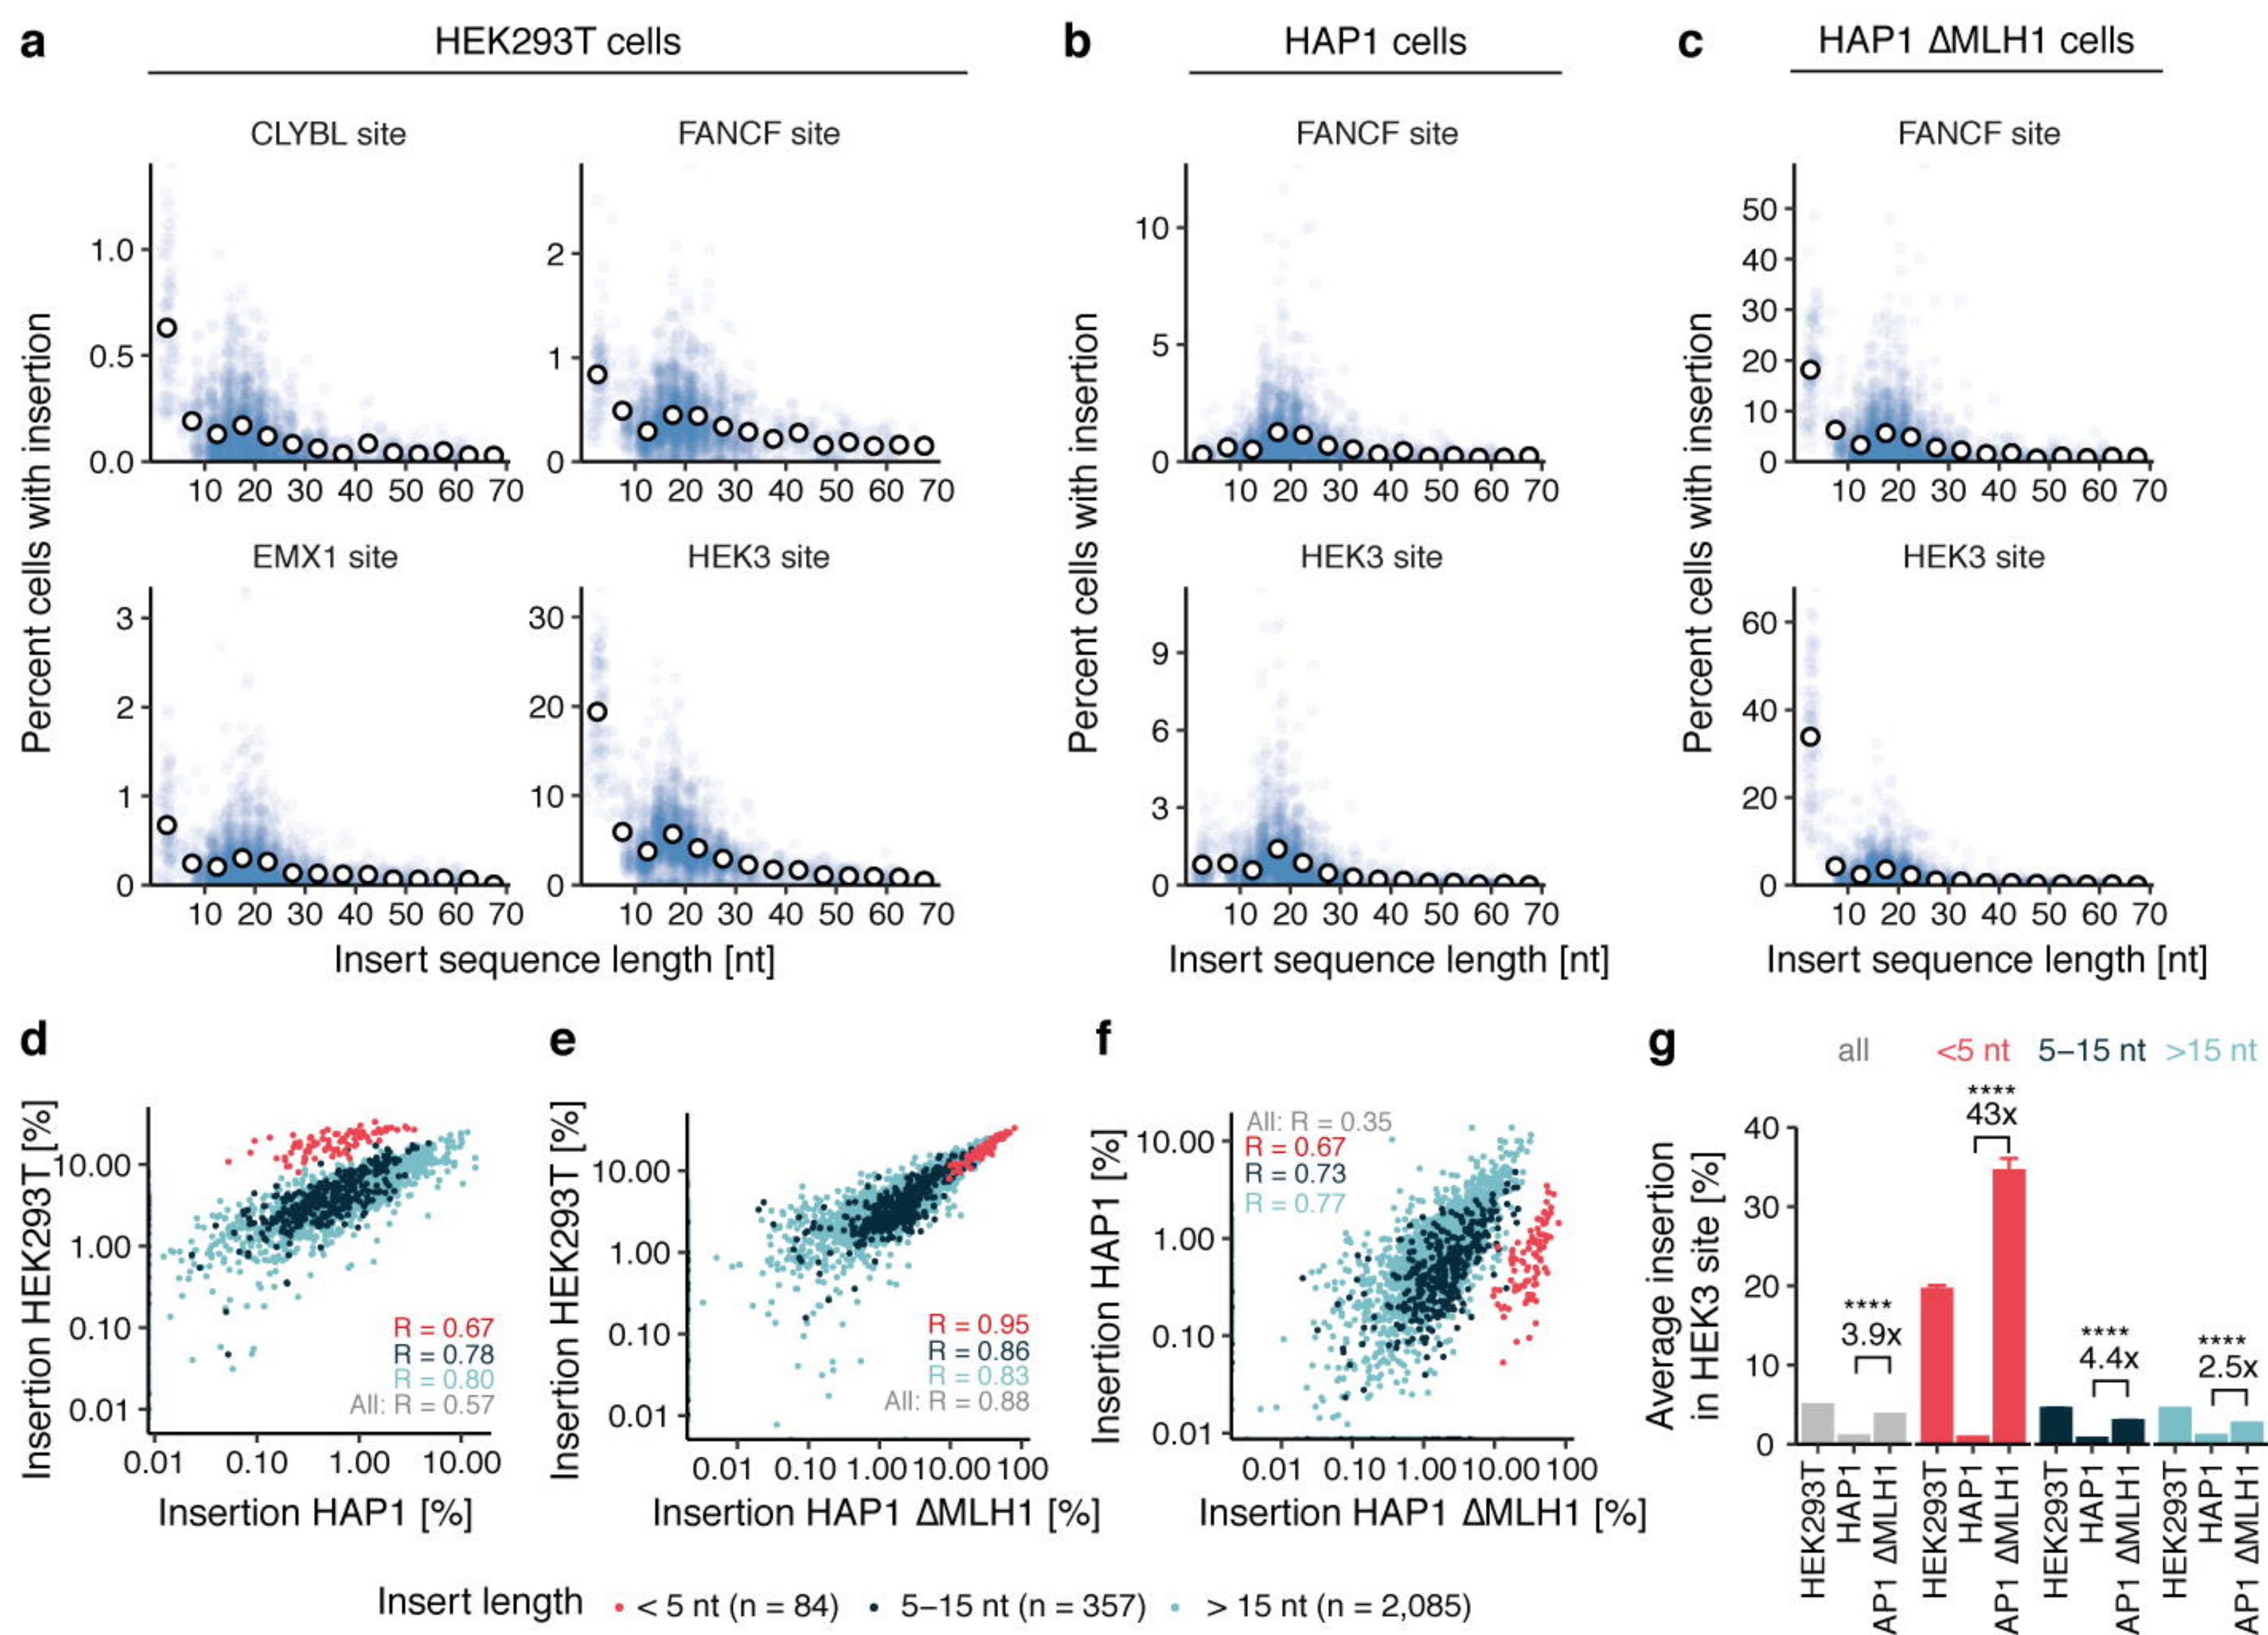

Figure 2



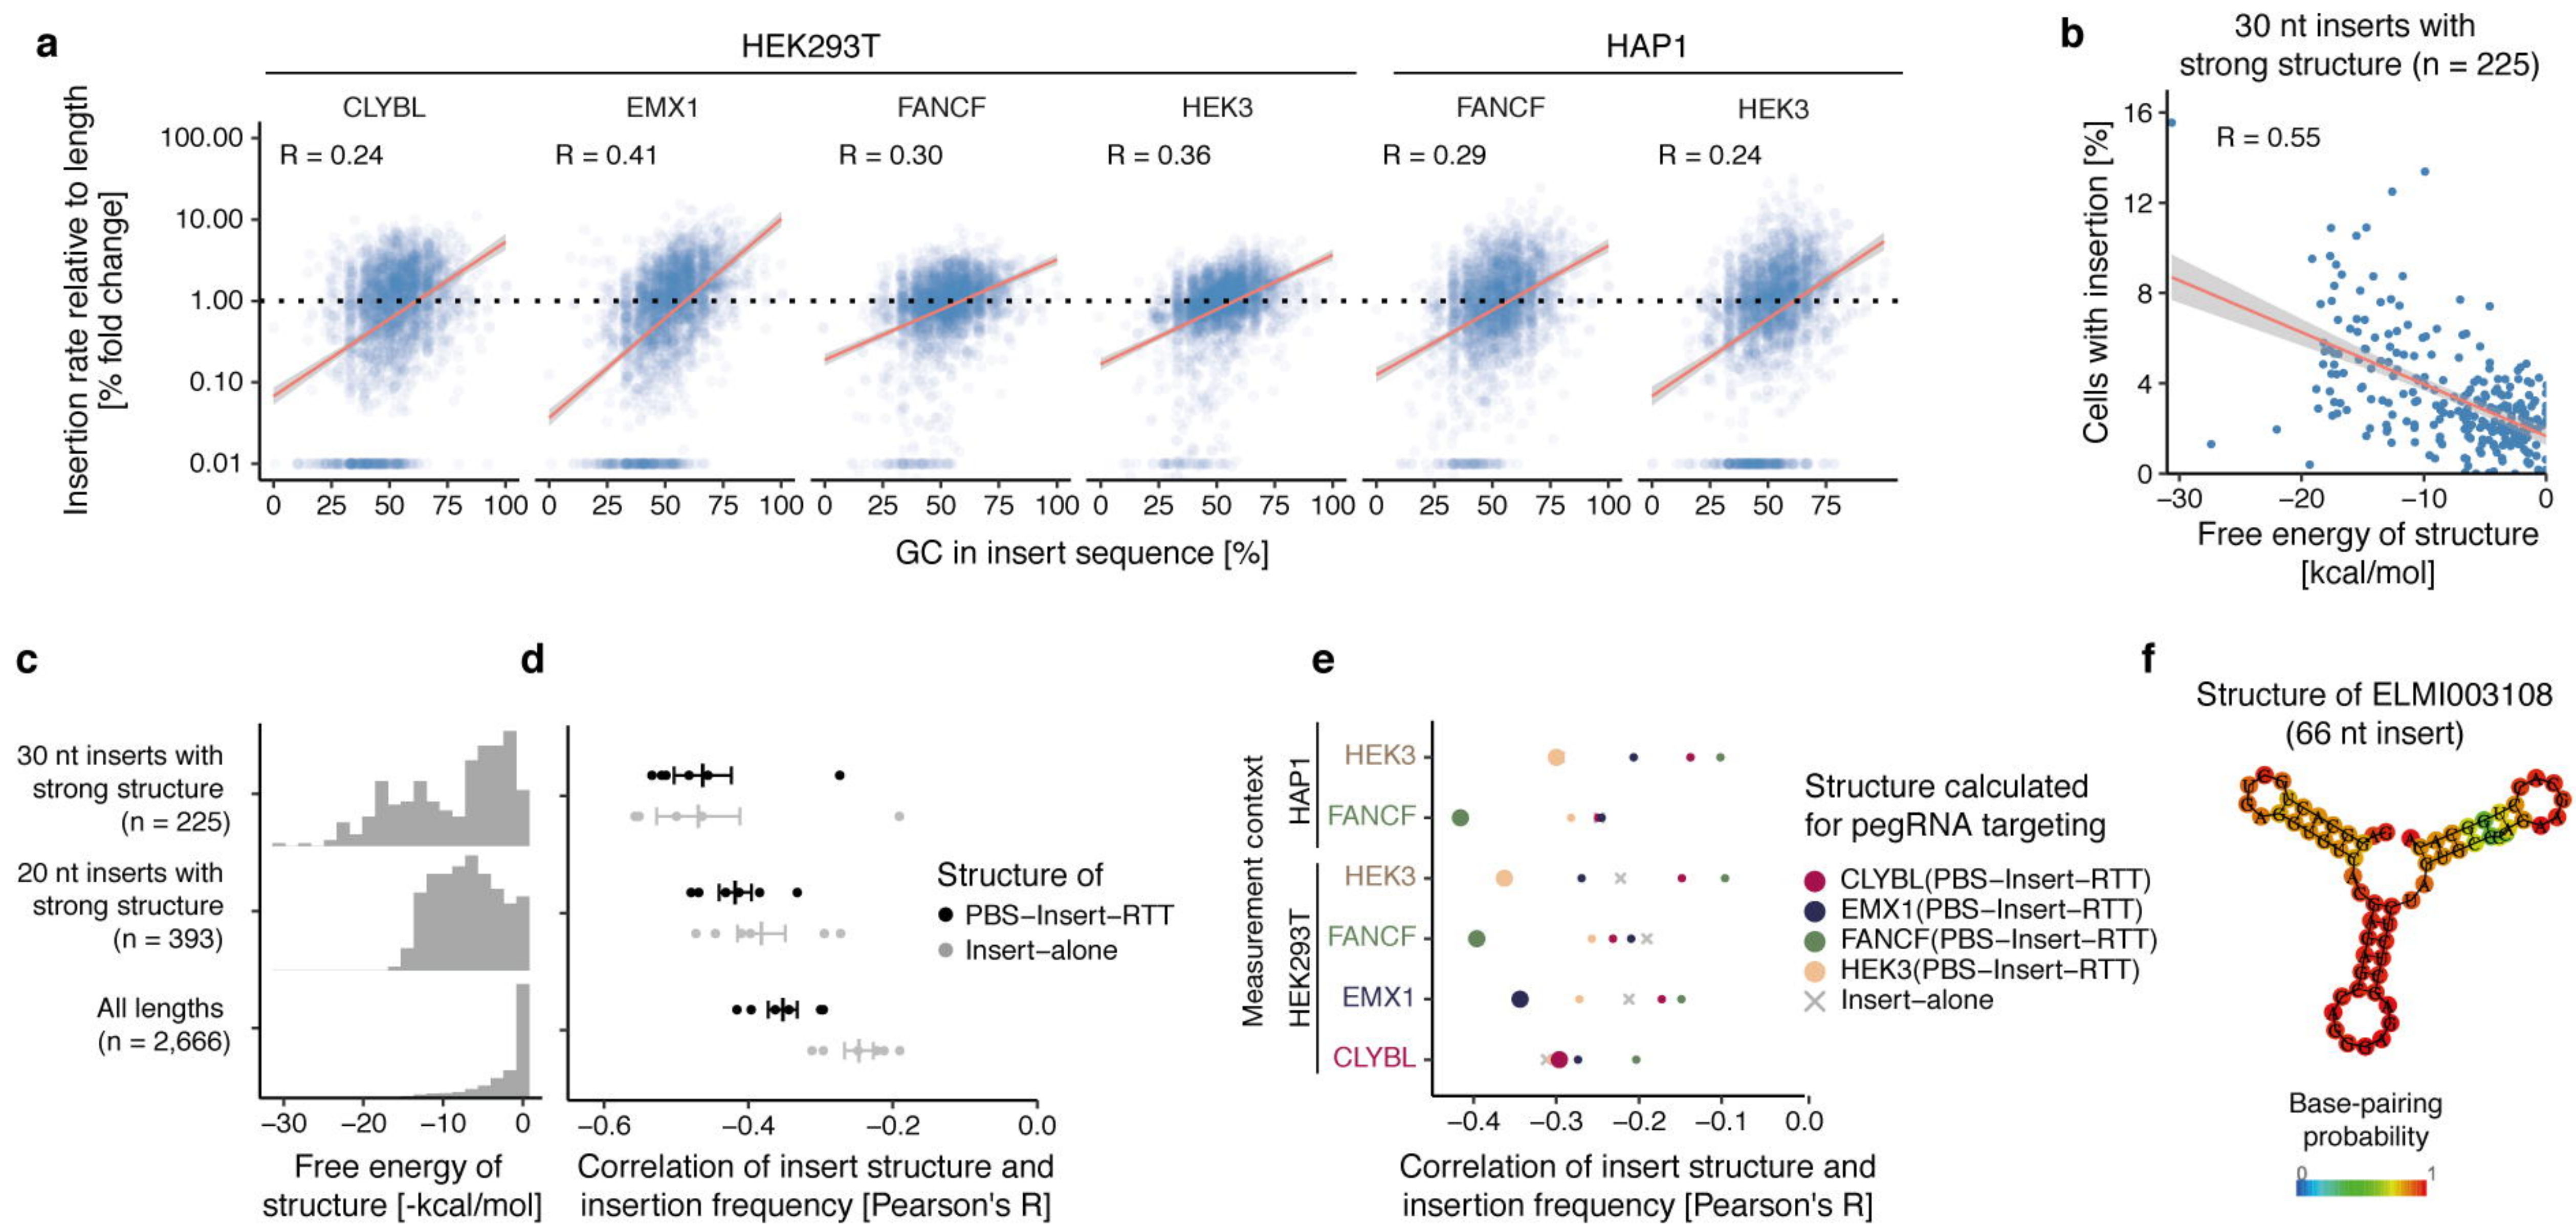

Figure 3



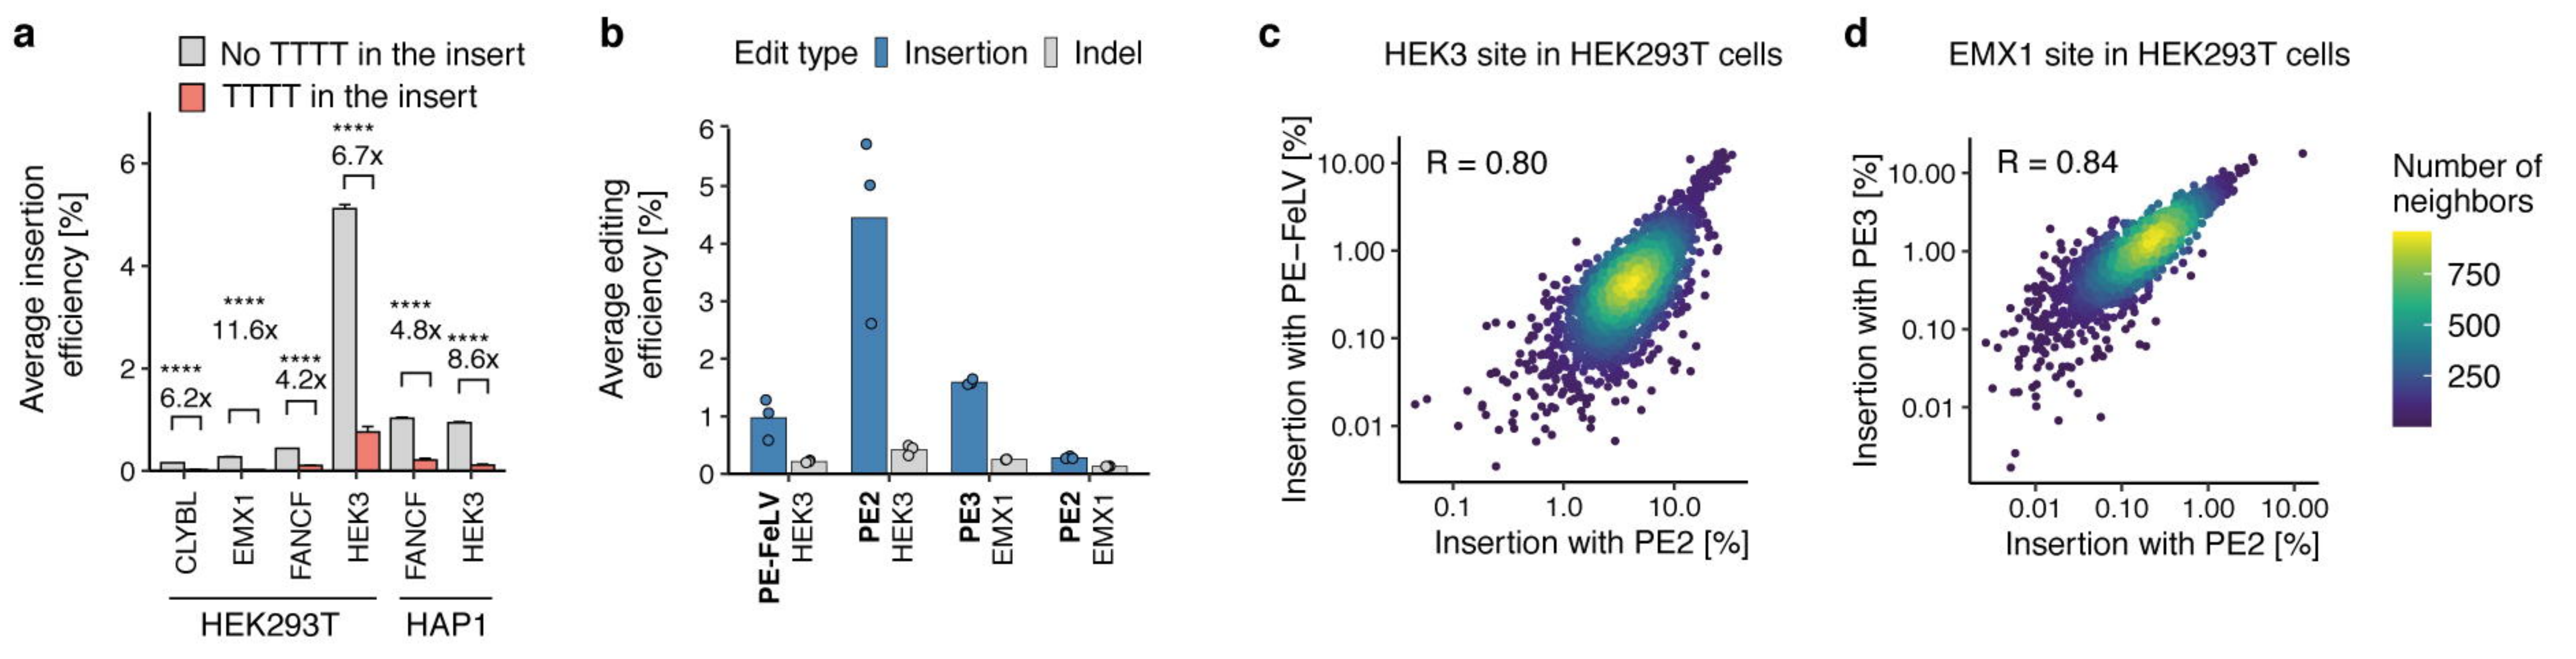

Figure 4



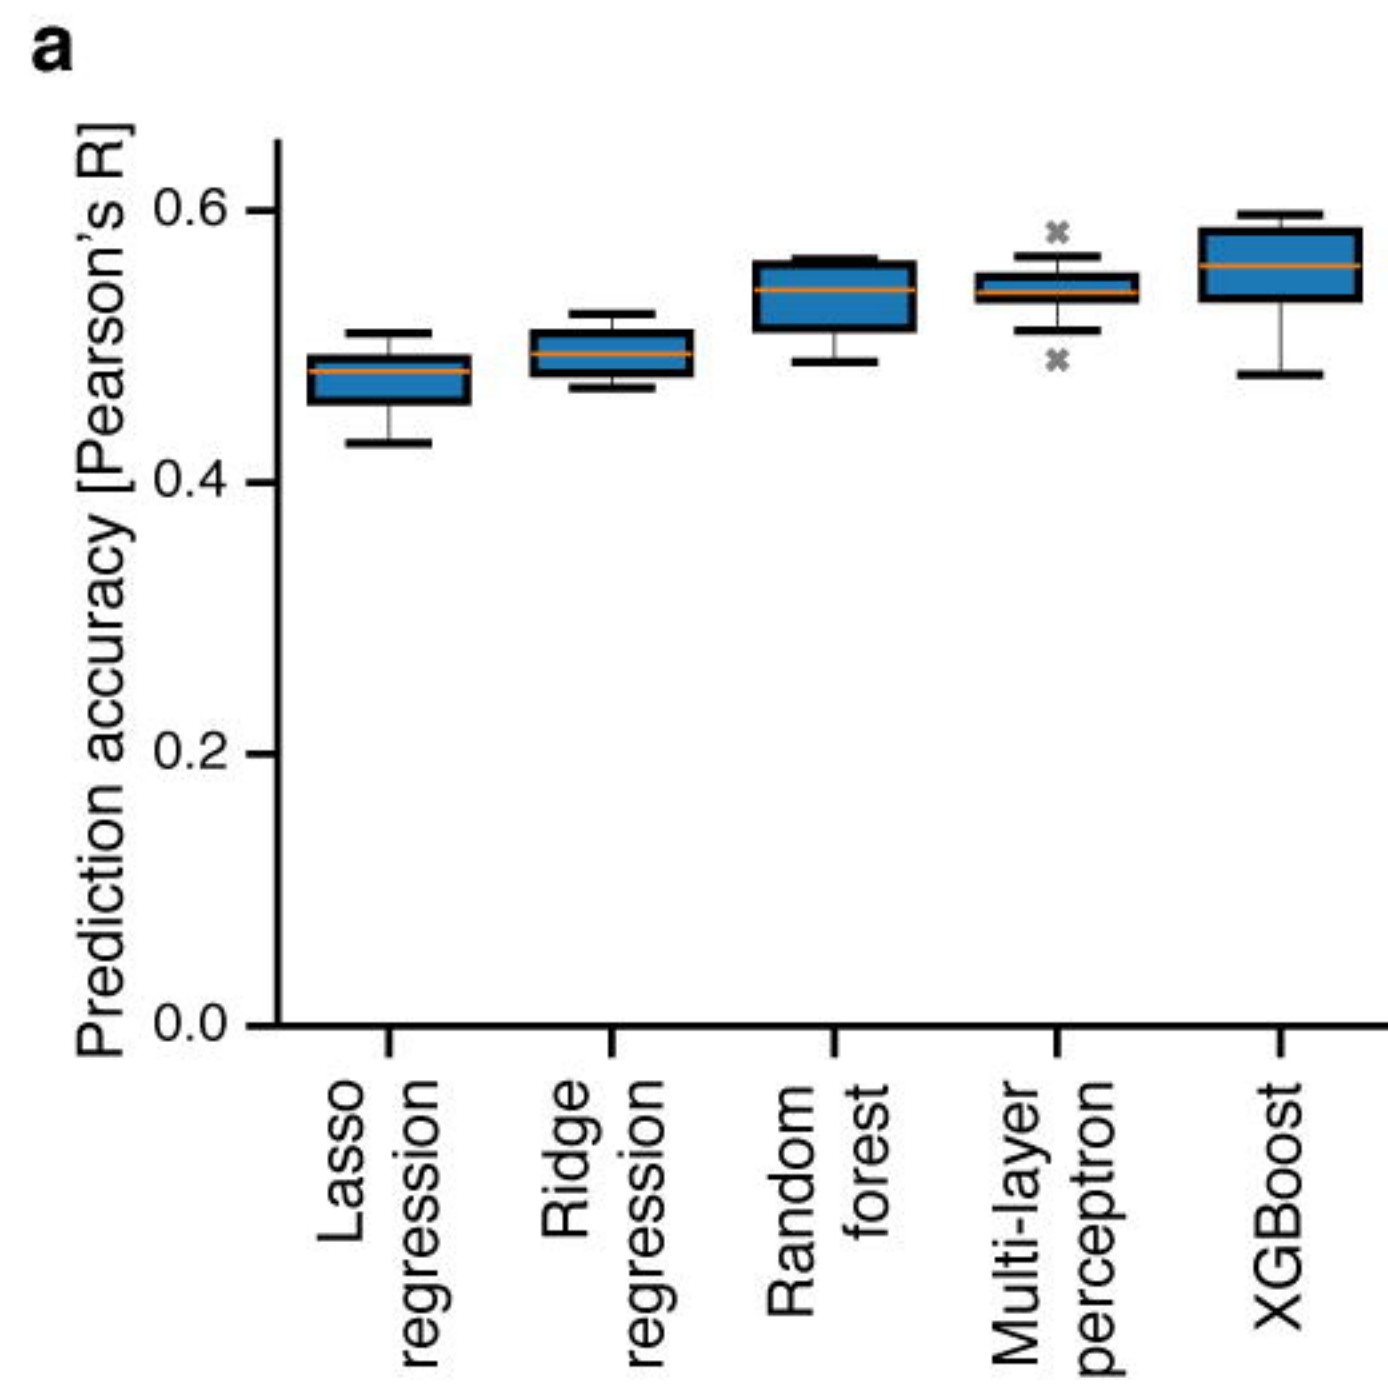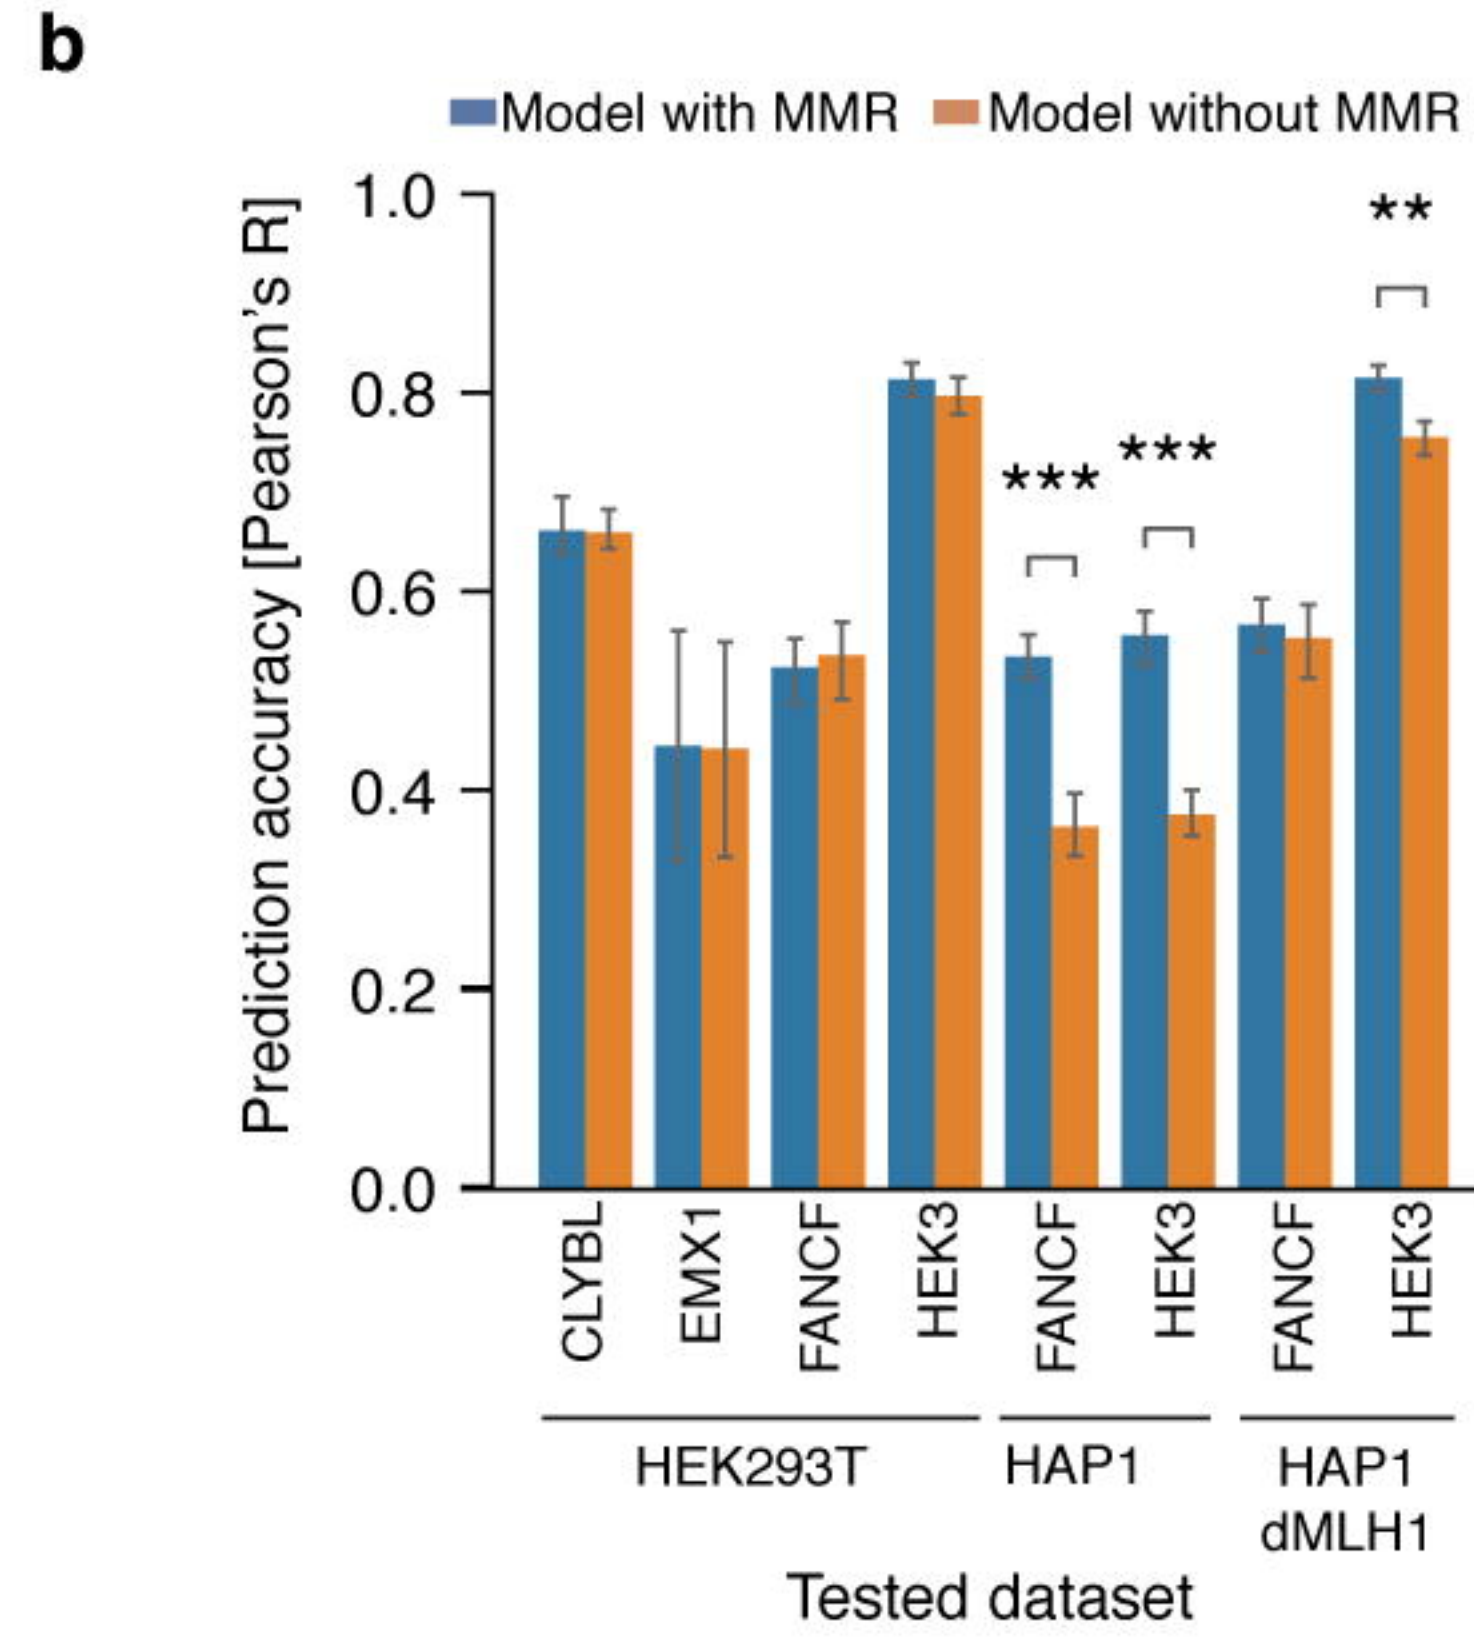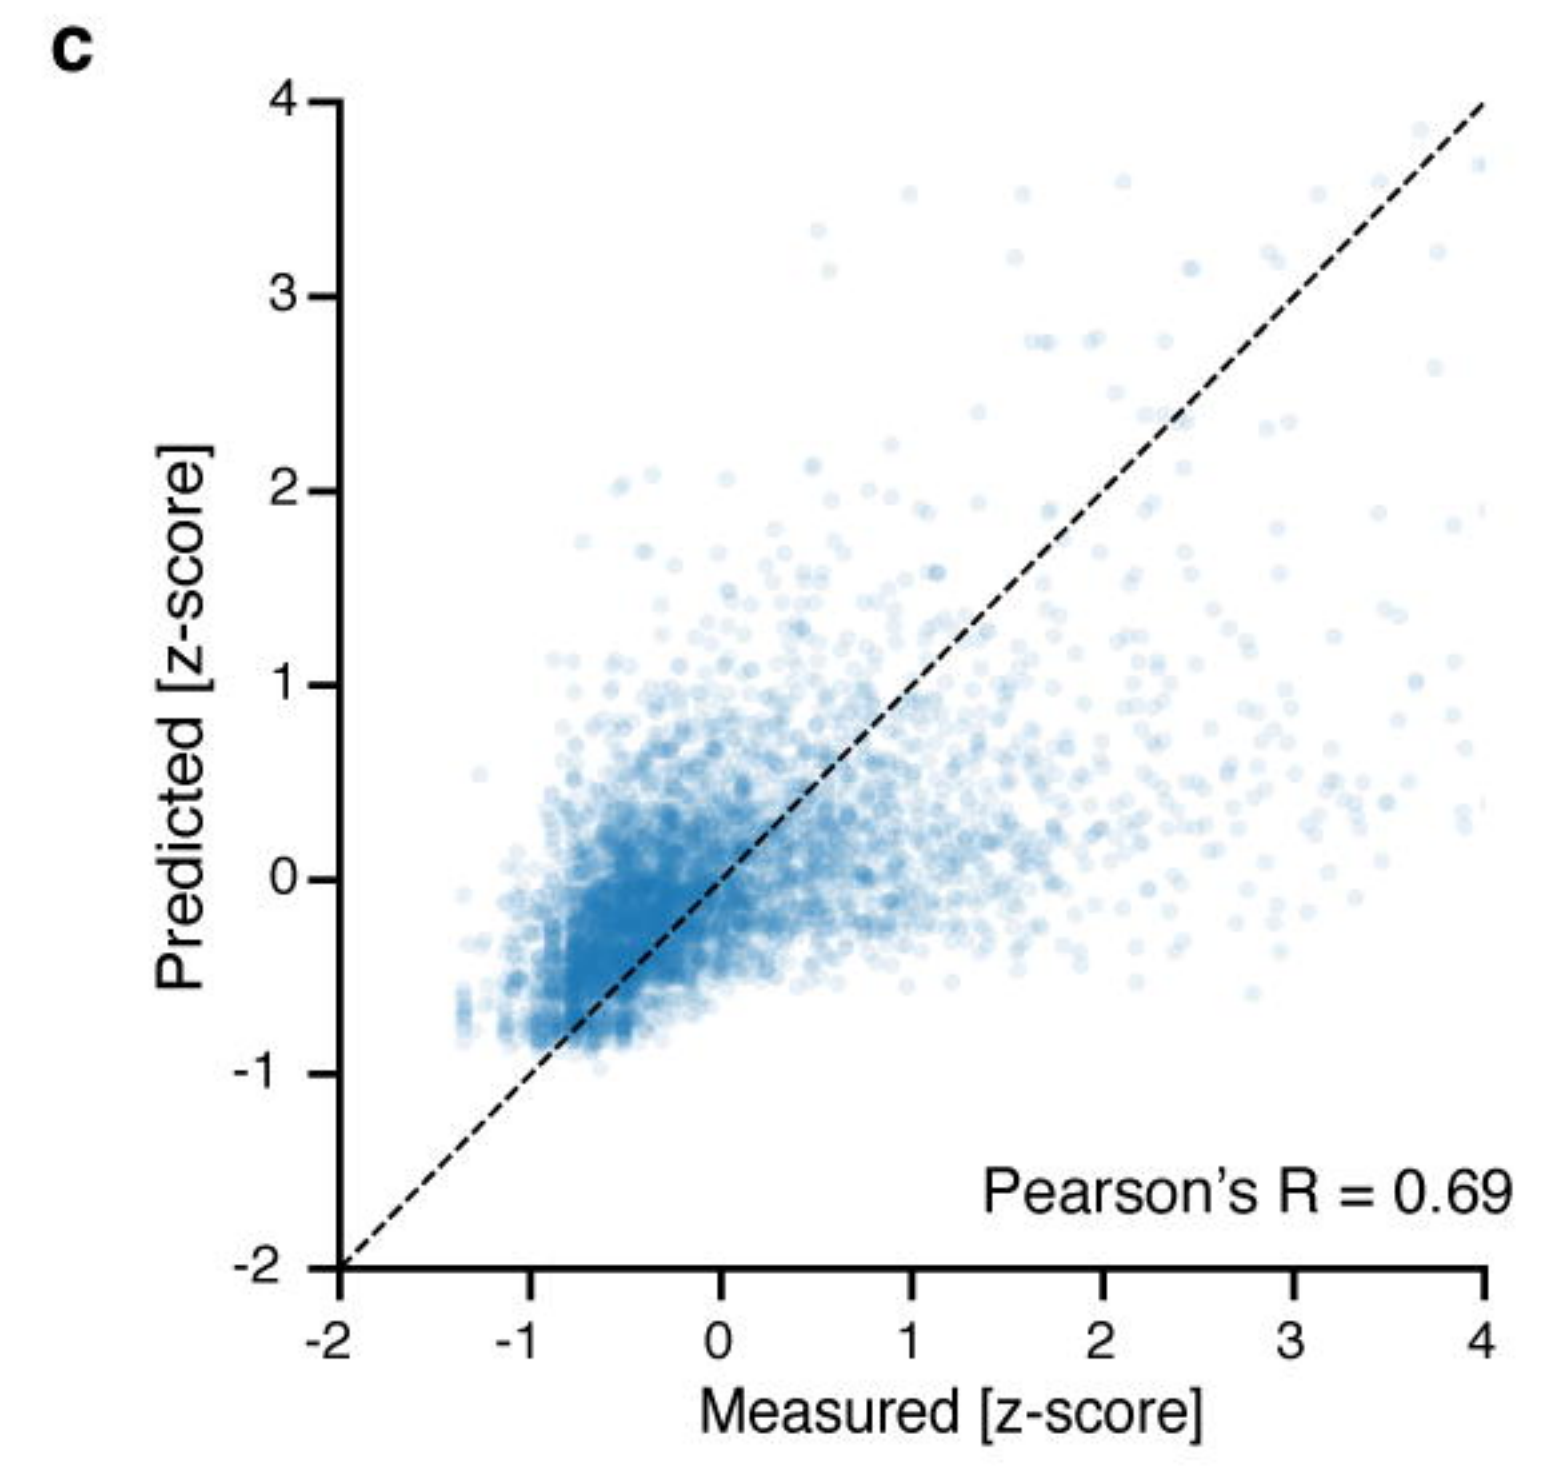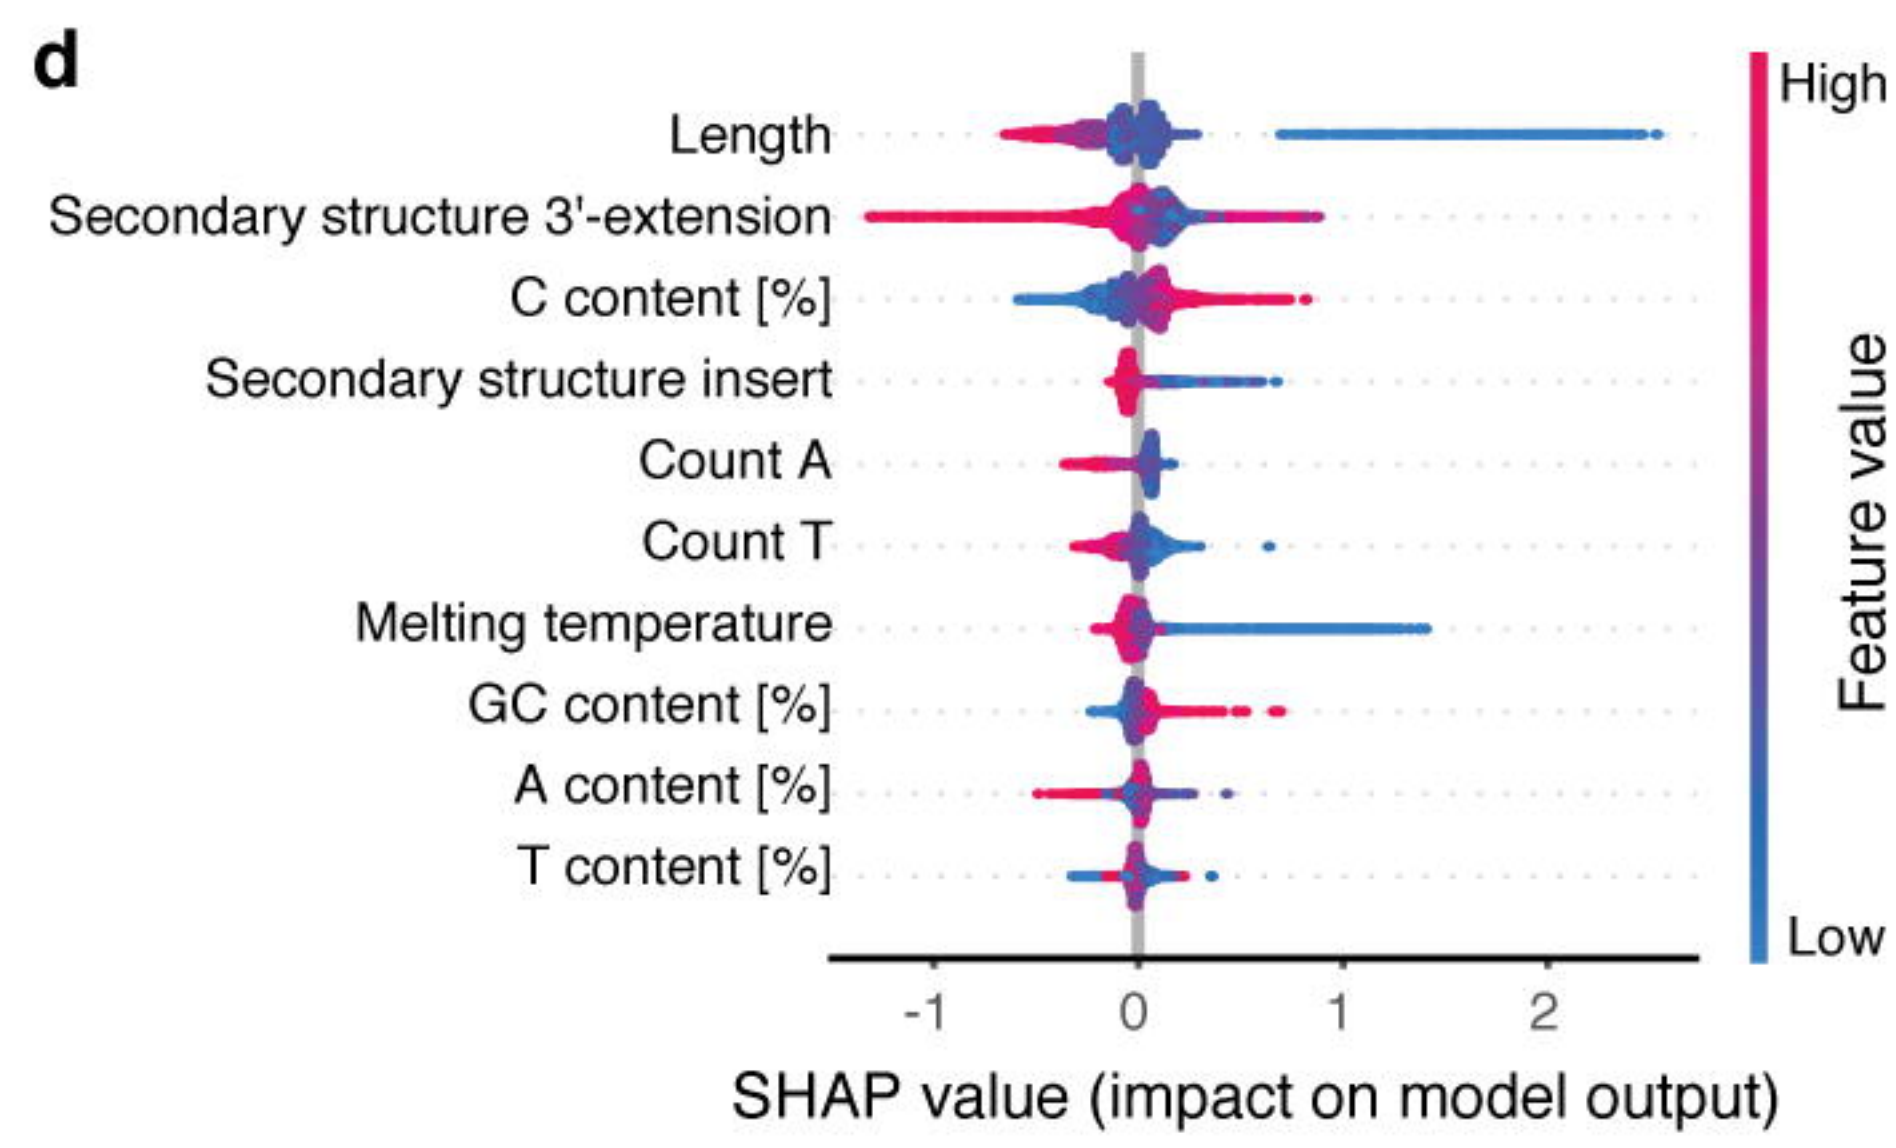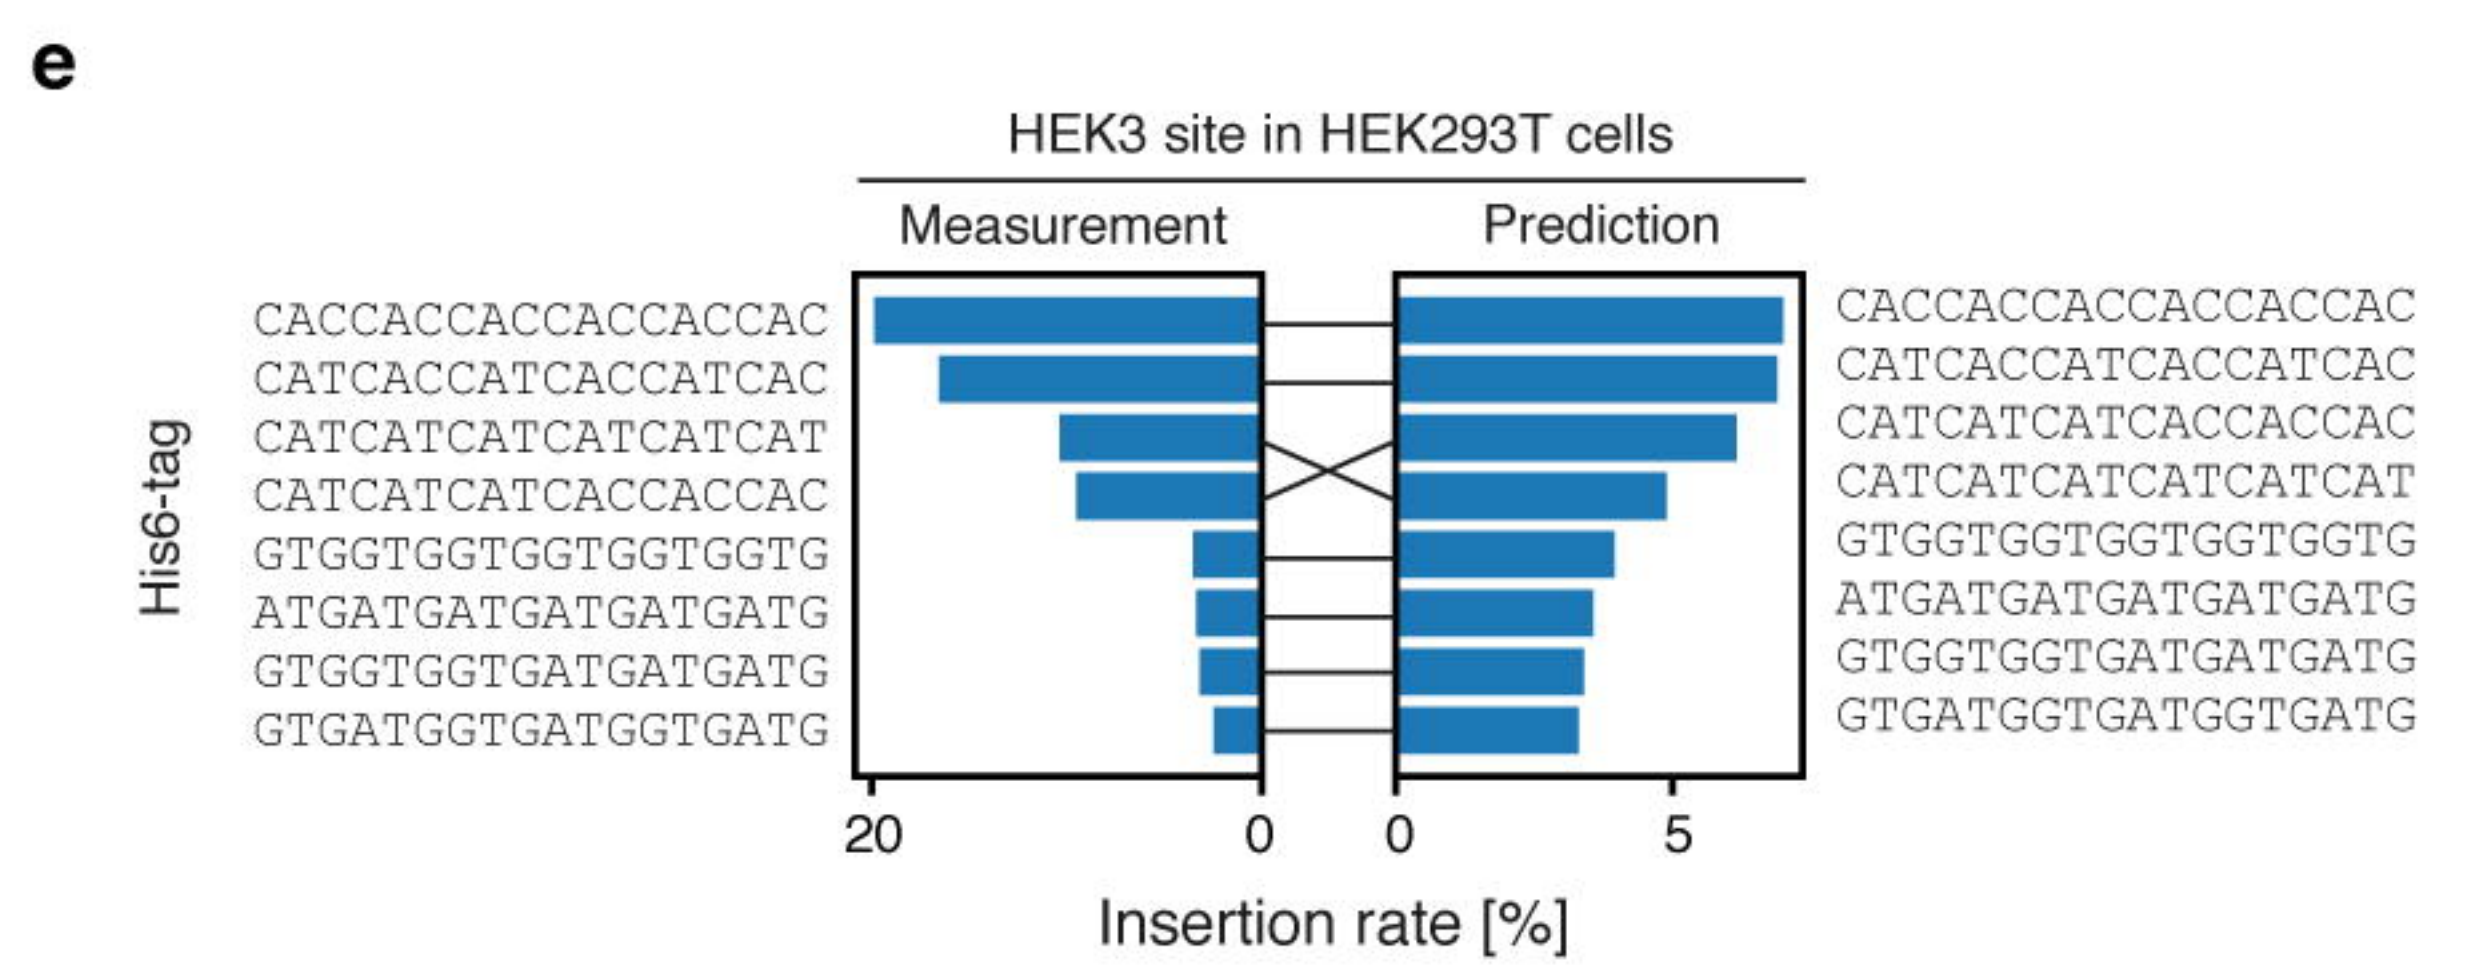

Source: https://www.biorxiv.org/content/10.1101/2021.11.10.468024v1.full.pdf
